# Supplementary material for: E-Selective synthesis of vinyl sulfones via silver-catalyzed sulfonylation of styrenes
Source: Royal Society of Chemistry journal article supplement (doi:10.1039/c8ob01502c), 2018-01-01

## Supporting Information

### **Stereoselective synthesis of vinyl sulfones via silver-catalyzed sulfonylation of styrenes**

Qingwen Gui,<sup>a</sup> Kang Han,<sup>a</sup> Zhuoliang Liu,<sup>b</sup> Zhaohong Su,<sup>a</sup> Xiaoli He,<sup>a</sup>  
Hongmei Jiang,<sup>a\*</sup> Bufan Tian,<sup>a</sup> Yong-Lai Feng,<sup>a</sup> and Yangyan Li<sup>c\*</sup>

<sup>a</sup> College of Science, Hunan Agricultural University, Changsha 410128, People's Republic of China  
E-mail: [jhmndcn@hunau.edu.cn](mailto:jhmndcn@hunau.edu.cn)

<sup>b</sup> College of Liberal Arts and Science, National University of Defense Technology, Changsha 410073,  
People's Republic of China

<sup>c</sup> College of Chemistry and Bioengineering, Hunan University of Science and Engineering,  
Yongzhou 425199, People's Republic of China  
E-mail: [liyangan2@163.com](mailto:liyangan2@163.com)

### **Table of Contents**

|                                                        |              |
|--------------------------------------------------------|--------------|
| <b>I General Consideration</b>                         | <b>2</b>     |
| <b>II Representative Procedure</b>                     | <b>2</b>     |
| <b>III Controlled experiment</b>                       | <b>2</b>     |
| <b>IV Characterization Data for Selected Compounds</b> | <b>3- 37</b> |

## I General Consideration:

All reagents and solvents were purchased commercially, and used without further purification. Thin-layer chromatography (TLC) was carried out on TLC Alumina sheets with silica gel 60 F<sub>254</sub> (Merck) and visualized by exposure to UV light (254 nm). Flash column chromatography was performed using Tsingdao silica gel (200-300). Reagents were purchased at the highest commercial quality and used without further purification, unless otherwise stated. With CDCl<sub>3</sub> as solvents, <sup>1</sup>H NMR and <sup>13</sup>C NMR were recorded at room temperature on the Bruker spectrometer (400 MHz <sup>1</sup>H, 101 MHz <sup>13</sup>C). The chemical-shifts scale is based on internal TMS. Data for <sup>1</sup>H NMR and <sup>13</sup>C NMR are reported as follows: chemical shift (δ, ppm), multiplicity, integration, and coupling constant (Hz).

## II General Procedure:

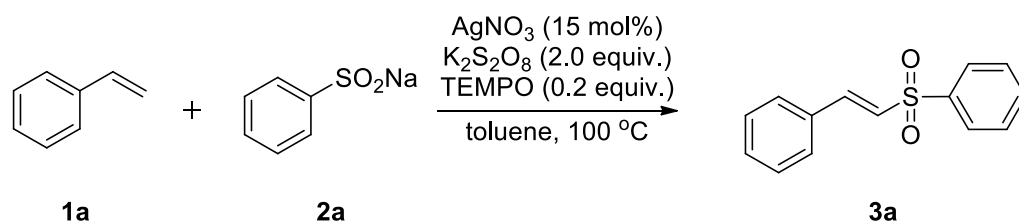

Styrene **1a** (0.2 mmol, 20.8 mg), sodium benzenesulfinate **2a** (0.2 mmol, 32.8 mg), AgNO<sub>3</sub> (0.03 mmol, 5.1 mg), K<sub>2</sub>S<sub>2</sub>O<sub>8</sub> (0.4 mmol, 108.0 mg), TEMPO (0.04 mmol, 6.2 mg) and toluene (1.0 mL) were added to a 35 mL Schlenk flask equipped with a high-vacuum PTFE valve-to-glass seal. Then the flask was stirred at 100 °C for 10 hours. After the reaction was quenched by addition of water, the mixture was extracted with dichloromethane, and the combined organic layer was dried over sodium sulfate. Concentration in vacuo followed by silica gel column purification with petroleum ether/ethyl acetate gave the desired product **3a** with 82% yield.

## III Controlled experiment

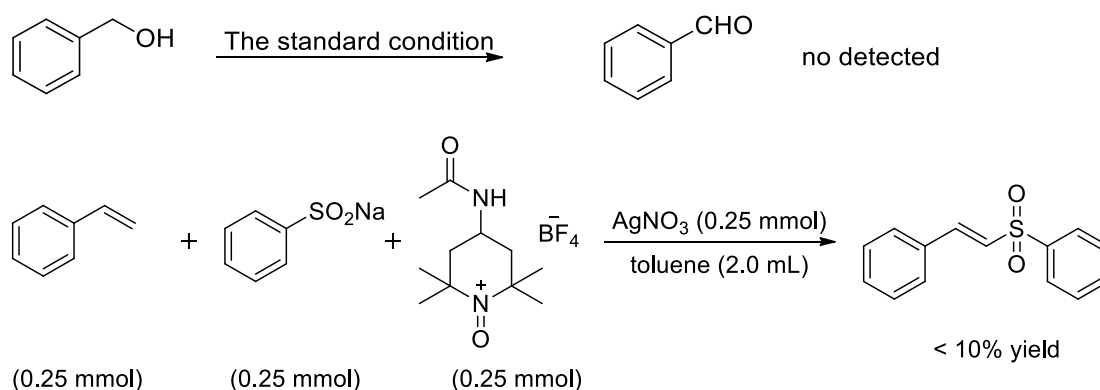

#### IV Characterization Data for Selected Compounds

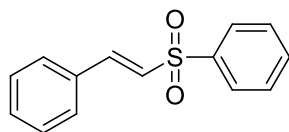

**(E)-2-(2-(phenylsulfonyl)vinyl)benzene 3a**<sup>(1)</sup> Yield: 82%; Yellow solid; Melting Point: 67-68 °C; Yellow solid;

<sup>1</sup>H NMR (400 MHz, CDCl<sub>3</sub>) δ 7.96 (d, *J* = 4.0 Hz, 2H), 7.69 (d, *J* = 16.0 Hz, 1H), 7.64 (t, *J* = 8.0 Hz, 1H), 7.55 (t, *J* = 8.0 Hz, 2H), 7.49 (d, *J* = 4.0 Hz, 2H), 7.40 (d, *J* = 4.0 Hz, 3H), 6.97 (d, *J* = 16.0 Hz, 1H);

<sup>13</sup>C NMR (101 MHz, CDCl<sub>3</sub>) δ 142.5, 140.7, 133.4, 132.3, 131.2, 129.3, 129.1, 128.5, 127.6, 127.2;

IR : 3059, 2924, 1615, 1492, 1447, 1309, 1146, 1084, 975, 817, 749, 689 cm<sup>-1</sup>;

MS: *m/z* C<sub>14</sub>H<sub>12</sub>O<sub>2</sub>S 244.3 (M<sup>+</sup>).

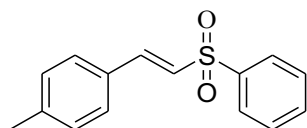

**(E)-1-methyl-4-(2-(phenylsulfonyl)vinyl)benzene 3b**<sup>(2)</sup> Yield: 85%; Melting Point: 138 °C; White solid;

<sup>1</sup>H NMR (400 MHz, CDCl<sub>3</sub>) δ 7.87 (d, *J* = 5.3 Hz, 2H), 7.58 (d, *J* = 15.4 Hz, 1H), 7.52 (d, *J* = 7.2 Hz, 1H), 7.51-7.53 (m, 2H), 7.29 (t, *J* = 10.1 Hz, 2H), 7.12 (d, *J* = 8.0 Hz, 2H), 6.73 (d, *J* = 15.4 Hz, 1H), 2.29 (s, 3H);

<sup>13</sup>C NMR (101 MHz, CDCl<sub>3</sub>) δ 141.5, 140.8, 139.8, 132.2, 128.7, 128.5, 128.2, 127.5, 126.5, 124.9, 20.5;

IR: 3054, 2920, 1606, 1447, 1147, 1084 cm<sup>-1</sup>;

MS: *m/z* C<sub>15</sub>H<sub>14</sub>O<sub>2</sub>S 258.3 (M<sup>+</sup>).

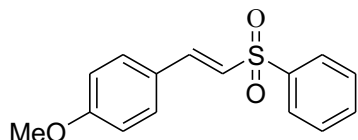

**(E)-1-methoxy-4-(2-(phenylsulfonyl)vinyl)benzene 3c**<sup>(2)</sup> Yield: 88%; Melting Point: 120 °C; White solid;

<sup>1</sup>H NMR (400 MHz, CDCl<sub>3</sub>) δ 7.87 (d, *J* = 8.6 Hz, 2H), 7.58 (d, *J* = 14.4 Hz, 1H), 7.50 (d, *J* = 8.0 Hz, 1H), 7.47 (t, *J* = 8.0 Hz, 2H), 7.36 (d, *J* = 8.8 Hz, 2H), 6.83 (d, *J* = 14.4 Hz, 2H), 6.64 (d, *J* = 15.3 Hz, 1H), 3.76 (s, 3H);

<sup>13</sup>C NMR (101 MHz, CDCl<sub>3</sub>) δ 161.0, 141.2, 140.0, 132.1, 129.3, 128.2, 126.4, 123.9, 123.3, 113.4, 54.4;

IR: 3056, 2934, 1602, 1446, 1145, 1085 cm<sup>-1</sup>;

MS: *m/z* C<sub>15</sub>H<sub>14</sub>O<sub>3</sub>S 274.3 (M<sup>+</sup>).

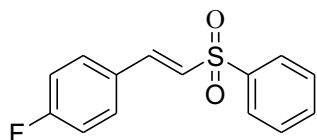

**(E)-1-Fluoro-4-(2-(phenylsulfonyl)vinyl)benzene 3d**<sup>(2)</sup> Yield: 77%; Melting Point: 108-110 °C; White solid;

<sup>1</sup>H NMR (400 MHz, CDCl<sub>3</sub>) δ 7.88 (d, *J* = 7.6 Hz, 2H), 7.61-7.51 (m, 2H), 7.48 (t, *J* = 7.5 Hz, 2H), 7.41 (dd, *J* = 8.1, 5.6 Hz, 2H), 7.01 (t, *J* = 8.5 Hz, 2H), 6.72 (d, *J* = 15.4 Hz, 1H);

<sup>13</sup>C NMR (101 MHz, CDCl<sub>3</sub>) δ 164.3 (d, *J*<sub>C-F</sub> = 251.5 Hz), 141.2, 140.6, 133.5, 129.4, 130.6 (d, *J*<sub>C-F</sub> = 7.7 Hz), 127.7, 128.6 (d, *J* = 3.4 Hz), 127.0 (d, *J*<sub>C-F</sub> = 2.3 Hz), 116.3 (d, *J*<sub>C-F</sub> = 21.9 Hz);

IR: 3057, 1617, 1446, 1146, 1085 cm<sup>-1</sup>.

MS: *m/z* C<sub>14</sub>H<sub>11</sub>FO<sub>2</sub>S 262.1 (M<sup>+</sup>).

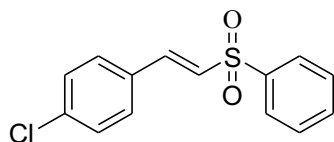

**(E)-1-Chloro-4-(2-(phenylsulfonyl)vinyl)benzene 3e**<sup>(2)</sup> Yield: 68%; Melting Point: 131 °C; White solid;

<sup>1</sup>H NMR (400 MHz, CDCl<sub>3</sub>) δ 7.86 (d, *J* = 7.7 Hz, 2H), 7.56 (d, *J* = 15.4 Hz, 1H), 7.55 (d, *J* = 8.6 Hz, 1H), 7.49 (t, *J* = 7.7 Hz, 2H), 7.35 (d, *J* = 8.6 Hz, 2H), 7.29 (d, *J* = 8.5 Hz, 2H), 6.76 (d, *J* = 15.4 Hz, 1H);

<sup>13</sup>C NMR (101 MHz, CDCl<sub>3</sub>) δ 141.0, 140.4, 137.2, 133.5, 130.8, 129.7, 129.4, 127.9, 127.7;

IR: 3058, 1613, 1486, 1145, 1083 cm<sup>-1</sup>;

MS: *m/z* C<sub>14</sub>H<sub>11</sub>ClO<sub>2</sub>S 278.7 (M<sup>+</sup>).

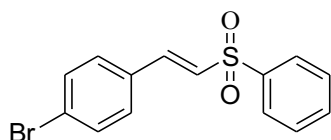

**(E)-1-Bromo-4-(2-(phenylsulfonyl)vinyl)benzene 3f**<sup>(2)</sup>Yield: 80%; Melting Point: 150 °C; White solid;

<sup>1</sup>H NMR (400 MHz, CDCl<sub>3</sub>) δ 7.88 (d, *J* = 8.0 Hz, 2H), 7.59 – 7.56 (m, 1H), 7.56 – 7.52 (m, 1H), 7.52-7.47 (m, 2H), 7.46 (d, *J* = 8.5 Hz, 2H), 7.28 (d, *J* = 8.3 Hz, 2H), 6.79 (d, *J* = 15.4 Hz, 1H);

<sup>13</sup>C NMR (101 MHz, CDCl<sub>3</sub>) δ 140.0, 139.3, 132.5, 131.3, 130.2, 128.9, 128.3, 126.9, 126.6, 124.6;

IR: 3052, 2920, 1653, 1516, 1462, 1382, 1247, 1078, 815, 749 cm<sup>-1</sup>;

MS: *m/z* C<sub>14</sub>H<sub>11</sub>BrO<sub>2</sub>S 323.2 (M<sup>+</sup>).

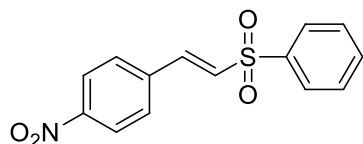

**(E)-1-Nitro-4-(2-(phenylsulfonyl)vinyl)benzene 3g**<sup>(3)</sup> Yield: 61%; Melting Point: 169-170 °C; Yellow solid;

<sup>1</sup>H NMR (400 MHz, CDCl<sub>3</sub>) δ 8.16 (d, *J* = 7.9 Hz, 2H), 7.90 (d, *J* = 7.3 Hz, 2H), 7.66 (d, *J* = 15.5 Hz, 1H), 7.58 (d, *J* = 8.8 Hz, 3H), 7.52 (t, *J* = 7.8 Hz, 2H), 6.93 (d, *J* = 15.6 Hz, 1H);

<sup>13</sup>C NMR (101 MHz, CDCl<sub>3</sub>) δ 147.9, 138.7, 138.2, 137.3, 132.9, 130.6, 128.5, 128.2, 126.9, 123.2;

IR: 3064, 2925, 1595, 1520, 1346, 1308, 1275, 1147, 811, 751 cm<sup>-1</sup>;

MS: *m/z* C<sub>14</sub>H<sub>11</sub>NO<sub>4</sub>S 289.3 (M<sup>+</sup>).

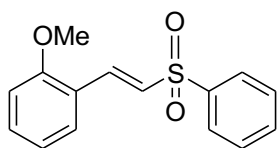

**(E)-2-Methoxy-4-(2-(phenylsulfonyl)vinyl)benzene 3h**<sup>(5)</sup> Yield: 69%; Melting Point: 93-94 °C; White solid;

<sup>1</sup>H NMR (400 MHz, CDCl<sub>3</sub>) δ 7.88 (d, *J* = 8.0 Hz, 2H), 7.82 (d, *J* = 15.5 Hz, 1H), 7.55-7.49 (m, 1H), 7.46 (t, *J* = 7.7 Hz, 2H), 7.38-7.26 (m, 2H), 7.00 (d, *J* = 15.5 Hz, 1H), 6.92-6.81 (m, 2H), 3.80 (s, 3H);

<sup>13</sup>C NMR (101 MHz, CDCl<sub>3</sub>) δ 157.8, 140.1, 137.5, 132.0, 131.4, 129.7, 128.2, 126.8, 126.5, 120.1, 119.7, 110.2, 54.4;

IR : 3052, 2920, 1648, 1465, 1385, 1277, 1142, 1023, 766, 638 cm<sup>-1</sup>;

MS: *m/z* C<sub>16</sub>H<sub>16</sub>O<sub>3</sub>S 288.4 (M<sup>+</sup>).

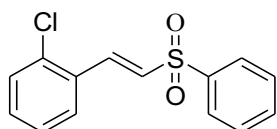

**(E)-2-Chloro-4-(2-(phenylsulfonyl)vinyl)benzene 3i**<sup>(2)</sup> Yield: 65%; Melting Point: 98-100 °C; White solid;

<sup>1</sup>H NMR (400 MHz, CDCl<sub>3</sub>) δ 8.02 (d, *J* = 15.4 Hz, 1H), 7.90 (d, *J* = 8.0 Hz, 2H), 7.57 (t, *J* = 7.3 Hz, 1H), 7.50 (t, *J* = 7.7 Hz, 2H), 7.44 (d, *J* = 7.7 Hz, 1H), 7.36 (d, *J* = 8.0 Hz, 1H), 7.27 (t, *J* = 7.6 Hz, 1H), 7.19 (t, *J* = 7.4 Hz, 1H), 6.83 (d, *J* = 15.5 Hz, 1H);

<sup>13</sup>C NMR (101 MHz, CDCl<sub>3</sub>) δ 139.2, 137.4, 134.3, 132.5, 130.9, 129.6, 129.4, 129.0, 128.3, 127.2, 126.8, 126.1;

IR : 3057, 3029, 1612, 1596, 1466, 1440, 1321, 1144, 1035, 965, 693, 660 cm<sup>-1</sup>;

MS: *m/z* C<sub>14</sub>H<sub>11</sub>ClO<sub>2</sub>S 278.8 (M<sup>+</sup>).

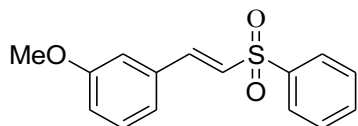

**(E)-3-Methoxy-4-(2-(phenylsulfonyl)vinyl)benzene 3j**<sup>(6)</sup> Yield: 74%; Melting Point: 120 °C; White solid;

<sup>1</sup>H NMR (400 MHz, CDCl<sub>3</sub>) δ 7.88 (d, *J* = 7.4 Hz, 2H), 7.58 (d, *J* = 15.4 Hz, 1H), 7.54 (d, *J* = 7.3 Hz, 1H), 7.48 (t, *J* = 7.5 Hz, 2H), 7.23 (t, *J* = 7.9 Hz, 1H), 7.00 (d, *J* = 7.6 Hz, 1H), 6.92-6.86 (m, 2H), 6.78 (d, *J* = 15.4 Hz, 1H), 3.74 (s, 3H);

<sup>13</sup>C NMR (101 MHz, CDCl<sub>3</sub>) δ 158.9, 141.4, 139.6, 132.6, 132.4, 129.1, 128.3, 126.6, 126.5, 120.2, 116.1, 112.3, 54.34;

IR : 3050, 2923, 1579, 1460, 1385, 1276, 1143, 1123, 1085, 747, 619 cm<sup>-1</sup>;

MS: m/z C<sub>15</sub>H<sub>14</sub>O<sub>3</sub>S 274.3(M<sup>+</sup>).

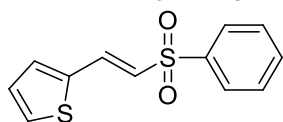

**(E)-2-(2-(phenylsulfonyl)vinyl)thiophene 3k**<sup>(3)</sup> Yield: 70%; Melting Point: 93-94°C; Brown solid;

<sup>1</sup>H NMR (400 MHz, CDCl<sub>3</sub>) δ 7.94 (d, *J* = 8.0 Hz, 2H), 7.80 (d, *J* = 16.0 Hz, 1H), 7.62 (t, *J* = 8.0 Hz, 1H), 7.55 (t, *J* = 8.0 Hz, 2H), 7.45 (d, *J* = 4.0 Hz, 1H), 7.26 (s, 1H), 7.13-7.05 (m, 1H), 6.65 (d, *J* = 16.0 Hz, 1H);

<sup>13</sup>C NMR (101 MHz, CDCl<sub>3</sub>) δ 140.8, 136.9, 136.1, 133.3, 132.5, 130.0, 129.3, 128.3, 127.7, 126.4;

IR : 3049, 2920, 1602, 1445, 1385, 1277, 1123, 1045, 805, 749 cm<sup>-1</sup>;

MS: m/z C<sub>12</sub>H<sub>10</sub>O<sub>2</sub>S<sub>2</sub> 250.3.0(M<sup>+</sup>).

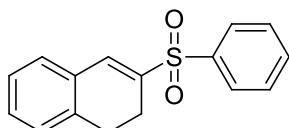

**3-(phenylsulfonyl)-1,2-dihydronaphthalene 3l**<sup>(8)</sup> Yield: 81%; Melting Point: 115-116 °C; White solid;

<sup>1</sup>H NMR (400 MHz, CDCl<sub>3</sub>) δ 7.94 (t, *J* = 8 Hz, 2H), 7.60 (t, *J* = 8 Hz, 2H), 7.53 (t, *J* = 12 Hz, 2H), 7.29-7.21 (m, *J* = 3H), 7.11 (t, *J* = 8 Hz, 1H), 2.86 (t, *J* = 8 Hz, 2H), 2.49 (t, *J* = 8 Hz, 2H);

<sup>13</sup>C NMR (101 MHz, CDCl<sub>3</sub>) δ 139.7, 138.1, 135.5, 135.2, 133.3, 130.9, 130.5, 129.2, 129.0, 127.9, 127.8, 127.1, 27.5, 21.7;

MS: m/z C<sub>16</sub>H<sub>14</sub>O<sub>2</sub>S 270.4 (M<sup>+</sup>).

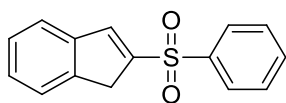

**2-(phenylsulfonyl)-1H-indene 3m**<sup>(9)</sup> Yield: 84%; Melting Point: 110-112 °C; White solid;

$^1\text{H NMR}$  (400 MHz,  $\text{CDCl}_3$ )  $\delta$  7.99 (d,  $J = 8.0$  Hz, 2H), 7.70(s,1H), 7.60 (t,  $J = 4.0$  Hz, 1H), 7.54 (t,  $J = 8$  Hz, 3H), 7.43 (t,  $J = 8.0$  Hz, 1H), 7.34 (t,  $J = 4.0$  Hz, 2H), 3.64 (s, 2H);

$^{13}\text{C NMR}$  (101 MHz,  $\text{CDCl}_3$ )  $\delta$  145.3, 144.3, 141.0, 140.6, 133.3, 129.3, 128.3, 127.7, 127.4, 124.4, 124.0, 37.83;

**MS:**  $m/z$   $\text{C}_{15}\text{H}_{12}\text{O}_2\text{S}$  256.3 ( $\text{M}^+$ ).

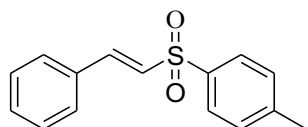

**(E)-1-(4-Methylphenyl)sulfonyl-2-phenylethene 4a**<sup>(1)</sup> Yield: 85%; Melting Point: 126 °C; White solid;

$^1\text{H NMR}$  (400 MHz,  $\text{CDCl}_3$ )  $\delta$  7.76 (d,  $J = 8.2$  Hz, 2H), 7.59 (d,  $J = 15.4$  Hz, 1H), 7.40 (d,  $J = 5.3$  Hz, 2H), 7.32 (t,  $J = 5.8$  Hz, 3H), 7.27 (d,  $J = 8.2$  Hz, 2H), 6.78 (d,  $J = 15.4$  Hz, 1H), 2.36(s, 3H);

$^{13}\text{C NMR}$  (101 MHz,  $\text{CDCl}_3$ )  $\delta$  143.6, 141.1, 136.9, 131.6, 130.3, 129.1, 128.2, 127.7, 126.9, 126.7, 20.8;

**IR :** 3056, 2920, 1659, 1549, 1299, 1120, 973, 815, 748, 685  $\text{cm}^{-1}$ ;

**MS:**  $m/z$   $\text{C}_{15}\text{H}_{14}\text{O}_2\text{S}$  258.3 ( $\text{M}^+$ ).

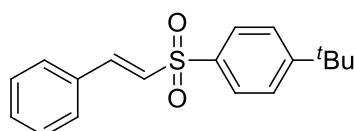

**(E)-1-(tert-butyl-4-(styrylsulfonyl)benzene 4b**<sup>(4)</sup> Yield: 83%; Yellow oil;

$^1\text{H NMR}$  (400 MHz,  $\text{CDCl}_3$ )  $\delta$  7.87 (d,  $J = 4.0$  Hz, 2H), 7.67 (d,  $J = 16.0$  Hz, 1H), 7.57 (d,  $J = 8.0$  Hz, 2H), 7.48 (d,  $J = 8.0$  Hz, 2H), 7.42-7.40 (m, 3H), 6.86 (d,  $J = 16.0$  Hz, 1H), 1.34 (s, 9H);

$^{13}\text{C NMR}$  (101 MHz,  $\text{CDCl}_3$ )  $\delta$  157.3, 141.9, 137.7, 132.4, 131.1, 129.0, 128.5, 127.6, 127.5, 126.4, 35.2, 31.0;

**IR :** 3060, 2922, 1669, 1551, 1310, 1122, 973, 870, 815, 755, 680  $\text{cm}^{-1}$ ;

**MS:**  $m/z$   $\text{C}_{18}\text{H}_{20}\text{O}_2\text{S}$  300.4 ( $\text{M}^+$ ).

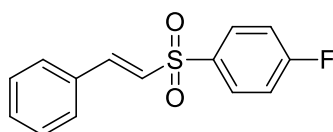

**(E)-1-fluoro-4-(styrylsulfonyl)benzene 4c**<sup>(1)</sup> Yield: 77%; Melting Point: 95-96 °C; White solid;

$^1\text{H NMR}$  (400 MHz,  $\text{CDCl}_3$ )  $\delta$  7.97 (dd,  $J = 8.0$  Hz, 2.4 Hz, 2H), 7.69 (d,  $J = 12.0$  Hz, 1H), 7.49 (d,  $J = 8.0$  Hz, 2H), 7.41 (d,  $J = 4.0$  Hz, 3H), 7.22 (t,  $J = 8.0$  Hz, 2H), 6.85 (d,  $J = 16.0$  Hz, 1H);

$^{13}\text{C NMR}$  (101 MHz,  $\text{CDCl}_3$ )  $\delta$  166.9 (d,  $J_{\text{C-F}} = 257.5$  Hz), 142.6, 136.8 (d,  $J_{\text{C-F}} = 3.0$  Hz), 132.2, 131.3, 130.5 (d,  $J_{\text{C-F}} = 10.1$  Hz), 129.1, 128.6, 127.1, 116.7 (d,  $J_{\text{C-F}} = 12.1$  Hz);

**IR :** 3058, 2919, 1654, 1563, 1410, 1272, 1138, 1079, 806, 751  $\text{cm}^{-1}$ ;

**MS:** m/z C<sub>14</sub>H<sub>11</sub>FO<sub>2</sub>S m/z 262.3 (M<sup>+</sup>).

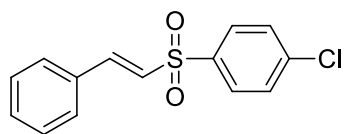

**(E)-1-chloro-4-(styrylsulfonyl)benzene 4d**<sup>(1)</sup> Yield: 71%; Melting Point: 107-108 °C; White solid;

**<sup>1</sup>H NMR** (400 MHz, CDCl<sub>3</sub>) δ 7.88 (d, *J* = 8.0 Hz, 2H), 7.69 (d, *J* = 16.0 Hz, 1H), 7.55-7.45 (m, 4H), 7.41 (t, *J* = 8.0 Hz, 3H), 6.84 (d, *J* = 16.0 Hz, 1H);

**<sup>13</sup>C NMR** (101 MHz, CDCl<sub>3</sub>) δ 143.0, 140.1, 139.2, 132.1, 131.4, 129.6, 129.1, 128.6, 126.8;

**IR** : 3060, 2925, 1614, 1578, 1476, 1394, 1318, 1147, 1088, 816, 753 cm<sup>-1</sup>;

**MS:** m/z C<sub>14</sub>H<sub>11</sub>ClO<sub>2</sub>S 278.8 (M<sup>+</sup>).

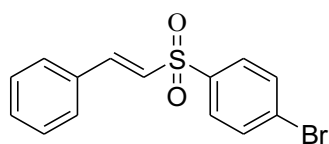

**(E)-1-(4-Bromophenyl)sulfonyl-2-phenylethene 4e**<sup>(1)</sup> Yield: 72%; Melting Point: 103.5-104.5 °C; White solid;

**<sup>1</sup>H NMR** (400 MHz, CDCl<sub>3</sub>) δ 7.73 (d, *J* = 8.3 Hz, 2H), 7.62 (d, *J* = 15.4 Hz, 1H), 7.58 (d, *J* = 8.3 Hz, 2H) 7.40 (d, *J* = 6.0 Hz, 2H), 7.35-7.31 (m, 3H), 6.76 (d, *J* = 15.4 Hz, 1H);

**<sup>13</sup>C NMR** (101 MHz, CDCl<sub>3</sub>) δ 142.0, 138.7, 131.6, 131.1, 130.4, 128.2, 128.1, 127.6, 125.7;

**IR** : 3055, 2924, 1663, 1516, 1462, 1382, 1247, 1078, 811, 750 cm<sup>-1</sup>;

**MS:** m/z C<sub>14</sub>H<sub>11</sub>BrO<sub>2</sub>S 323.2 (M<sup>+</sup>).

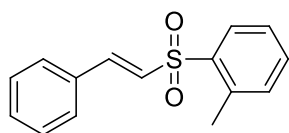

**(E)-1-methyl-2-(styrylsulfonyl)benzene 4f**<sup>(1)</sup> Yield: 63%; Yellow oil;

**<sup>1</sup>H NMR** (400 MHz, CDCl<sub>3</sub>) δ 8.12 (d, *J* = 8.0 Hz, 1H), 7.69 (d, *J* = 16.0 Hz, 1H), 7.51 (t, *J* = 8.0 Hz, 3H), 7.40 (t, *J* = 4.0 Hz, 4H), 7.30 (d, *J* = 8.0 Hz, 1H), 6.85 (d, *J* = 16 Hz, 1H), 2.64 (s, 3H);

**<sup>13</sup>C NMR** (101 MHz, CDCl<sub>3</sub>) δ 142.8, 138.0, 133.6, 132.6, 132.4, 131.2, 129.4, 129.1, 128.6, 126.7, 126.7, 20.3;

**IR** : 3055, 2921, 1659, 1540, 1295, 1125, 977, 815, 748, 685 cm<sup>-1</sup>;

**MS:** m/z C<sub>15</sub>H<sub>14</sub>O<sub>2</sub>S 258.3(M<sup>+</sup>).

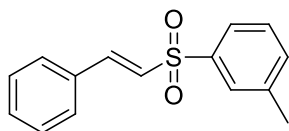

**(E)-1-methyl-3-(styrylsulfonyl)benzene 4g**<sup>(1)</sup> Yield: 76%; Yellow oil;

**<sup>1</sup>H NMR** (400 MHz, CDCl<sub>3</sub>) δ 7.78 (s, 2H), 7.70 (d, *J* = 16.0 Hz, 1H), 7.61 (d, *J* = 8.0



Hz, 2H), 7.46-7.37 (m, 5H), 6.88 (d,  $J = 16.0$  Hz, 1H), 2.46 (s, 3H);  
 $^{13}\text{C}$  NMR (101 MHz,  $\text{CDCl}_3$ )  $\delta$  142.2, 140.5, 139.6, 134.2, 132.4, 131.2, 129.2, 129.1, 128.6, 127.9, 127.4, 124.8, 21.3;  
IR : 3056, 2920, 1655, 1549, 1295, 1124, 973, 815, 748, 684  $\text{cm}^{-1}$ ;  
MS:  $m/z$   $\text{C}_{15}\text{H}_{15}\text{O}_2\text{S}$  258.3(M<sup>+</sup>).

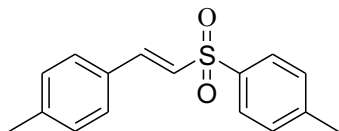

**(E)-1-Methyl-4-(2-tosylvinyl)benzene 4h**<sup>(1)</sup> Yield: 86%; Melting Point:152-155 °C;  
White solid;

$^1\text{H}$  NMR (400 MHz,  $\text{CDCl}_3$ )  $\delta$  7.75 (d,  $J = 8.1$  Hz, 2H), 7.55 (d,  $J = 15.4$  Hz, 1H), 7.29 (d,  $J = 8.0$  Hz, 2H), 7.26 (d,  $J = 8.2$  Hz, 2H), 7.11 (d,  $J = 7.9$  Hz, 2H), 6.72 (d,  $J = 15.4$  Hz, 1H), 2.36 (s, 3H), 2.29 (s, 3H);

$^{13}\text{C}$  NMR (101 MHz,  $\text{CDCl}_3$ )  $\delta$  143.2, 140.9, 140.7, 136.9, 128.9, 128.7, 128.6, 127.5, 126.6, 125.3, 20.6, 20.5;

IR : 3057, 2925, 1658, 1546, 1299, 1125, 976, 815, 748, 684  $\text{cm}^{-1}$ ;

MS:  $m/z$   $\text{C}_{16}\text{H}_{16}\text{O}_2\text{S}$  272.4(M<sup>+</sup>).

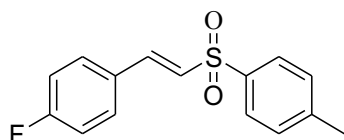

**(E)-1-Fluoro-4-(2-tosylvinyl)benzene 4i**<sup>(1)</sup> Yield: 71%; White oil;

$^1\text{H}$  NMR (400 MHz,  $\text{CDCl}_3$ )  $\delta$  7.75 (d,  $J = 8.1$  Hz, 2H), 7.54 (d,  $J = 15.4$  Hz, 1H), 7.40 (d,  $J = 8.3$  Hz, 2H), 7.27 (d,  $J = 8.0$  Hz, 2H), 7.00 (t,  $J = 8.5$  Hz, 2H), 6.71 (d,  $J = 15.4$  Hz, 1H), 2.36 (s, 3H);

$^{13}\text{C}$  NMR (101 MHz,  $\text{CDCl}_3$ )  $\delta$  164.3 (d,  $J_{\text{C-F}} = 251.2$  Hz), 143.4, 139.6, 136.7, 129.6, 129.5, 127.7 (d,  $J_{\text{C-F}} = 3.4$  Hz), 126.4, 126.3, 115.3 (d,  $J_{\text{C-F}} = 21.9$  Hz), 20.6;

IR: 3058, 3020, 1620, 1446, 1146, 1086, 970  $\text{cm}^{-1}$ .

MS:  $m/z$   $\text{C}_{15}\text{H}_{13}\text{FO}_2\text{S}$  276.3 (M<sup>+</sup>).

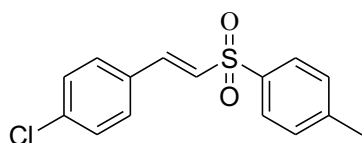

**(E)-1-Chloro-4-(2-tosylvinyl)benzene 4j**<sup>(1)</sup> Yield: 77%; Melting Point:139-142 °C;  
White solid;

$^1\text{H}$  NMR (400 MHz,  $\text{CDCl}_3$ )  $\delta$  7.75 (d,  $J = 8.2$  Hz, 2H), 7.53 (d,  $J = 15.4$  Hz, 1H), 7.33 (d,  $J = 8.5$  Hz, 2H), 7.29 (d,  $J = 2.6$  Hz, 2H), 7.27 (d,  $J = 2.1$  Hz, 1H), 6.76 (d,  $J = 15.4$  Hz, 1H), 2.36 (s, 3H);

$^{13}\text{C}$  NMR (101 MHz,  $\text{CDCl}_3$ )  $\delta$  143.5, 139.4, 136.4, 136.1, 129.9, 129.0, 128.6, 128.3, 127.2, 126.7, 20.6;

IR : 3057, 3028, 1620, 1596, 1466, 1144, 1035, 968, 693, 664  $\text{cm}^{-1}$ ;

MS:  $m/z$   $\text{C}_{15}\text{H}_{13}\text{ClO}_2\text{S}$  292.7 (M<sup>+</sup>).

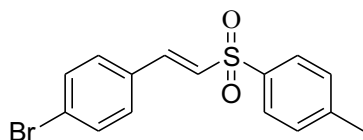

**(E)-1-Bromo-4-(2-tosylvinyl)benzene 4k**<sup>(1)</sup> Yield: 73%; Melting Point: 163-164 °C, White solid;

<sup>1</sup>H NMR (400 MHz, CDCl<sub>3</sub>) δ 7.75 (d, *J* = 8.2 Hz, 2H), 7.51 (d, *J* = 15.4 Hz, 1H), 7.45 (d, *J* = 8.4 Hz, 2H), 7.27 (t, *J* = 7.6 Hz, 4H), 6.77 (d, *J* = 15.4 Hz, 1H), 2.37 (s, 3H);

<sup>13</sup>C NMR (101 MHz, CDCl<sub>3</sub>) δ 143.5, 139.4, 136.4, 131.3, 130.3, 128.9, 128.7, 127.3, 126.7, 124.4, 20.6;

IR: 3053, 2920, 1652, 1516, 1462, 1384, 1247, 1079, 817, 754 cm<sup>-1</sup>;

MS: m/z C<sub>15</sub>H<sub>13</sub>BrO<sub>2</sub>S 337.2 (M<sup>+</sup>).

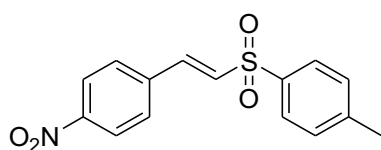

**(E)-1-Nitro-4-(2-tosylvinyl)benzene 4l**<sup>(7)</sup> Yield: 69%; Yellow solid;

<sup>1</sup>H NMR (400 MHz, CDCl<sub>3</sub>) δ 8.17 (d, *J* = 8.5 Hz, 2H), 7.77 (d, *J* = 8.0 Hz, 2H), 7.56 (d, *J* = 8.5 Hz, 3H), 7.30 (d, *J* = 8.0 Hz, 2H), 6.93 (d, *J* = 15.5 Hz, 1H), 2.38 (s, 3H);

<sup>13</sup>C NMR (101 MHz, CDCl<sub>3</sub>) δ 147.9, 144.1, 137.6, 137.5, 135.7, 131.0, 129.1, 128.1, 126.9, 123.2, 20.6;

IR: 3067, 2922, 1595, 1520, 1347, 1275, 1147, 815, 751 cm<sup>-1</sup>;

MS: m/z C<sub>15</sub>H<sub>13</sub>NO<sub>4</sub>S 303.3 (M<sup>+</sup>).

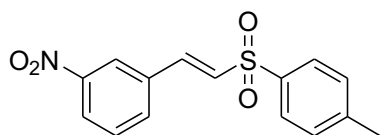

**(E)-3-Nitro-4-(2-tosylvinyl)benzene 4m**<sup>(1)</sup> Yield: 60%; Yellow oil;

<sup>1</sup>H NMR (400 MHz, CDCl<sub>3</sub>) δ 8.25 (s, 1H), 8.20-8.14 (m, 1H), 7.77 (d, *J* = 8.1 Hz, 2H), 7.72 (d, *J* = 7.7 Hz, 1H), 7.62 (d, *J* = 15.4 Hz, 1H), 7.53 (t, *J* = 8.0 Hz, 1H), 7.30 (d, *J* = 8.0 Hz, 2H), 6.95 (d, *J* = 15.4 Hz, 1H), 2.38 (s, 3H);

<sup>13</sup>C NMR (101 MHz, CDCl<sub>3</sub>) δ 147.6, 143.9, 137.8, 135.8, 133.2, 133.2, 130.0, 129.2, 129.1, 126.9, 124.2, 121.7, 20.6;

IR: 3068, 2920, 1599, 1526, 1346, 1270, 1148, 811, 752 cm<sup>-1</sup>;

MS: m/z C<sub>15</sub>H<sub>13</sub>NO<sub>4</sub>S 303.3 (M<sup>+</sup>).

## References:

- (1) L. L. Wang, H. L. Yue, D. S. Yang, *J. Org. Chem.* **2017**, *82*, 6857-6864.
- (2) G. W. Rong, J. C. Mao, *J. Org. Chem.* **2015**, *80*, 7652-7657.
- (3) R. Y. Mao, Z. Yuan, R. Zhang, *Org. Chem. Front.* **2016**, *3*, 1498-1502.
- (4) S. Y. Cai, Y. H. Xu, D. L. Chen, *Org. Lett.* **2016**, *18*, 2990-2993.
- (5) P. Katrun, S. Chiampanichayakul, K. Korworapan, M. Pohmakotr, V. Reutrakul, T. Jaipetch,

- C. Kuhakarn, *Eur. J. Org. Chem.* **2010**, 29, 5633-5641.
- (6) M. Julia, A. Righini, D. Uguen, *J. Chem. Soc., Perkin Trans. 1: Org. & Bio-Org. Chem. (1972-1999)*, **1978**, 12, 1646-1651.
- (7) V. Baliah, S. Shanmuganathan. *J. Indian Chem. Soc.* **1958**, 35, 31-36.
- (8) A. U. Meyer, S. Jager, D. P. Hair, B. Konig. *A. Synthesis & catalysis.* **2015**, 357, 2050-2054
- (9) H. Qian, X. Huang, *Synlett.* **2001**, 12, 1913-1916.

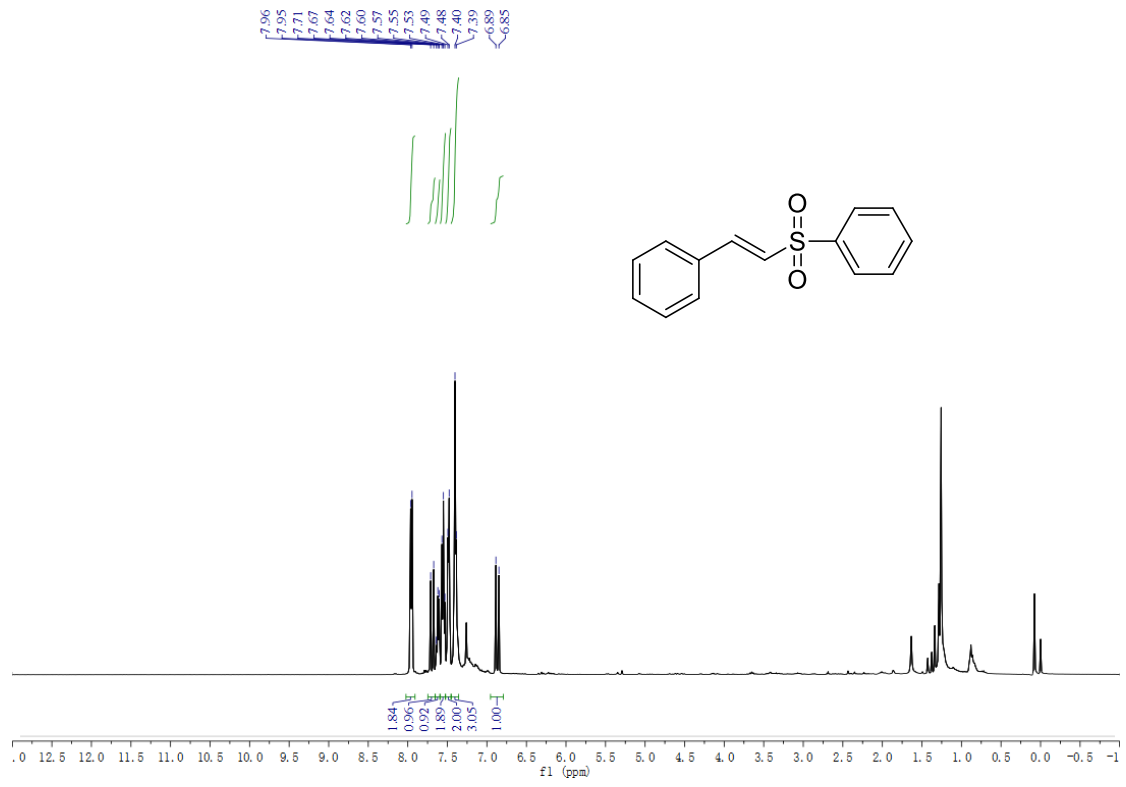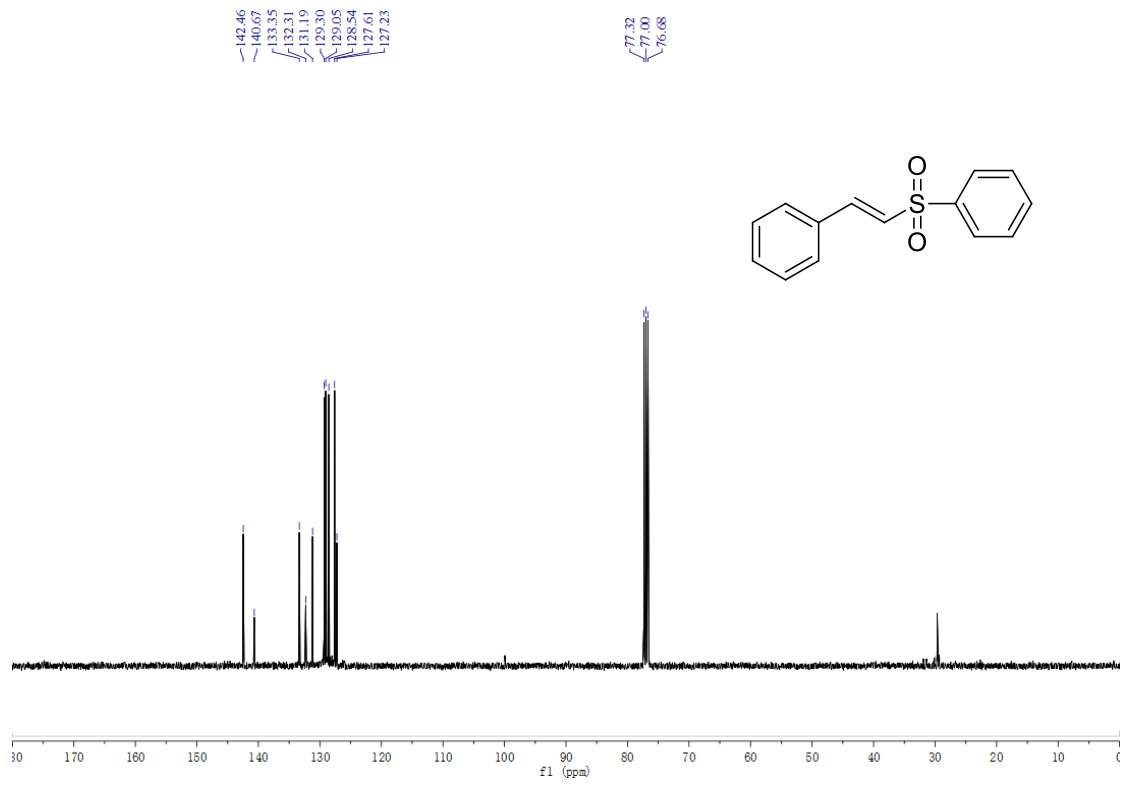

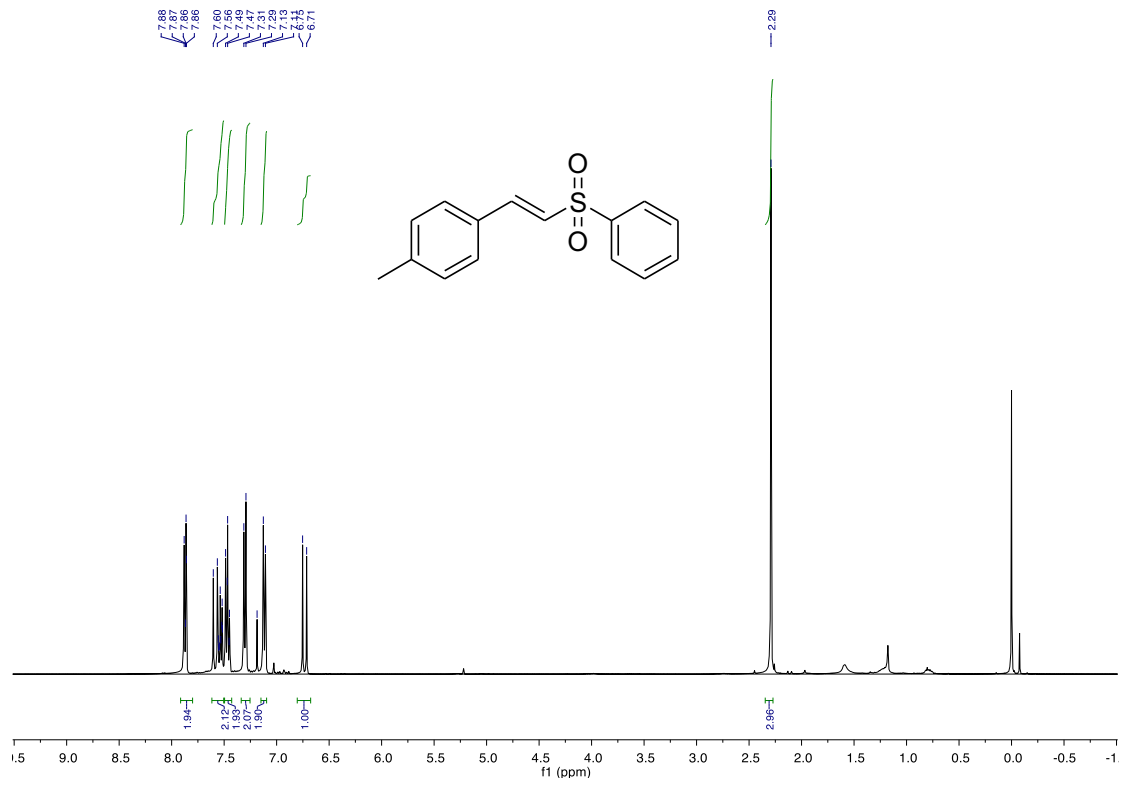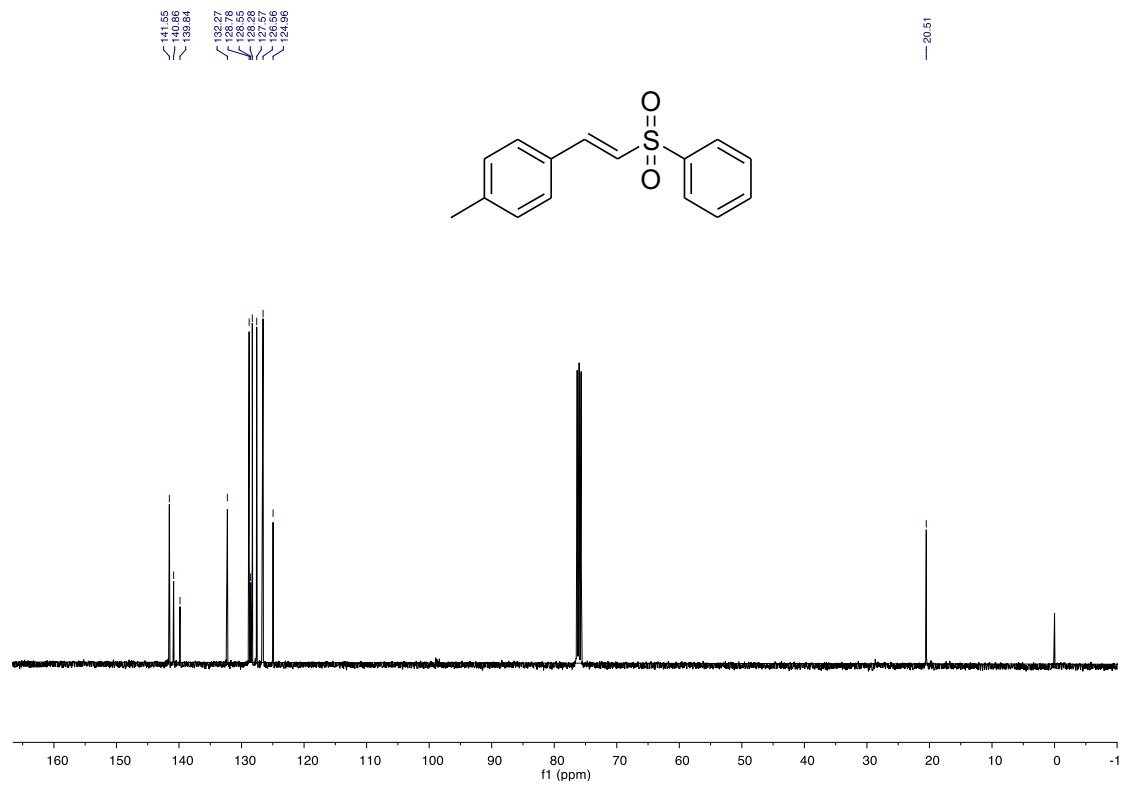

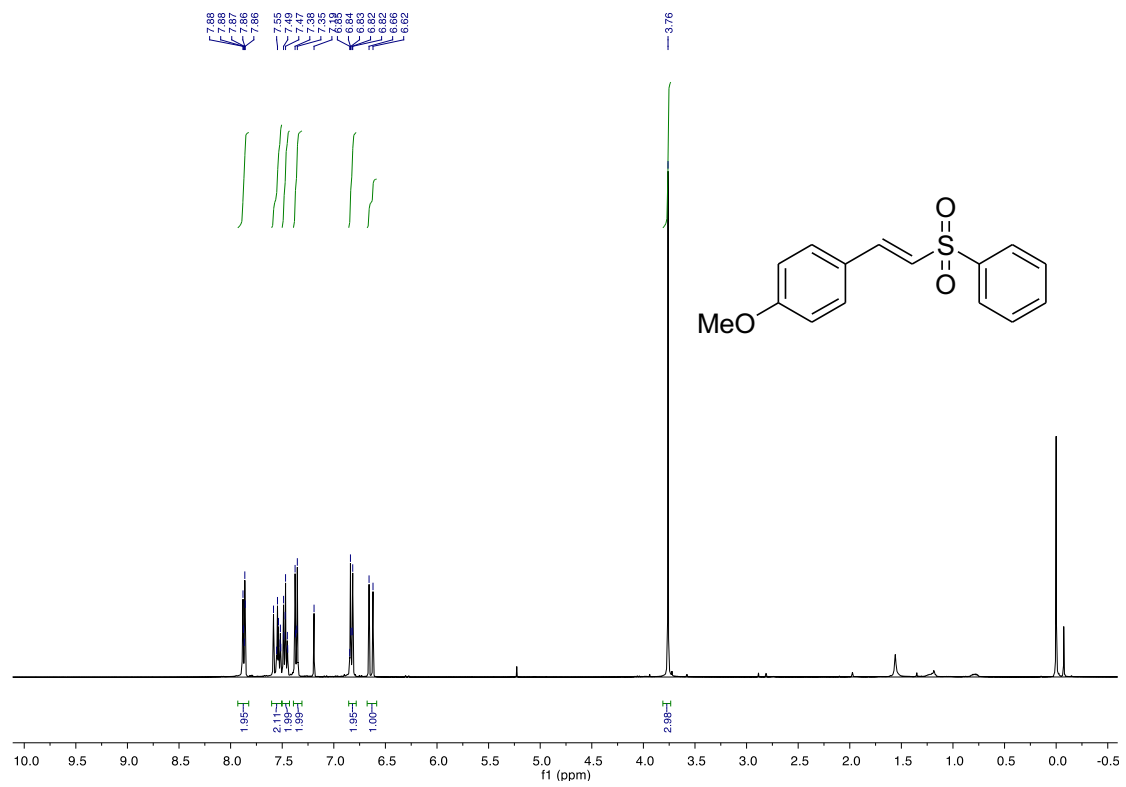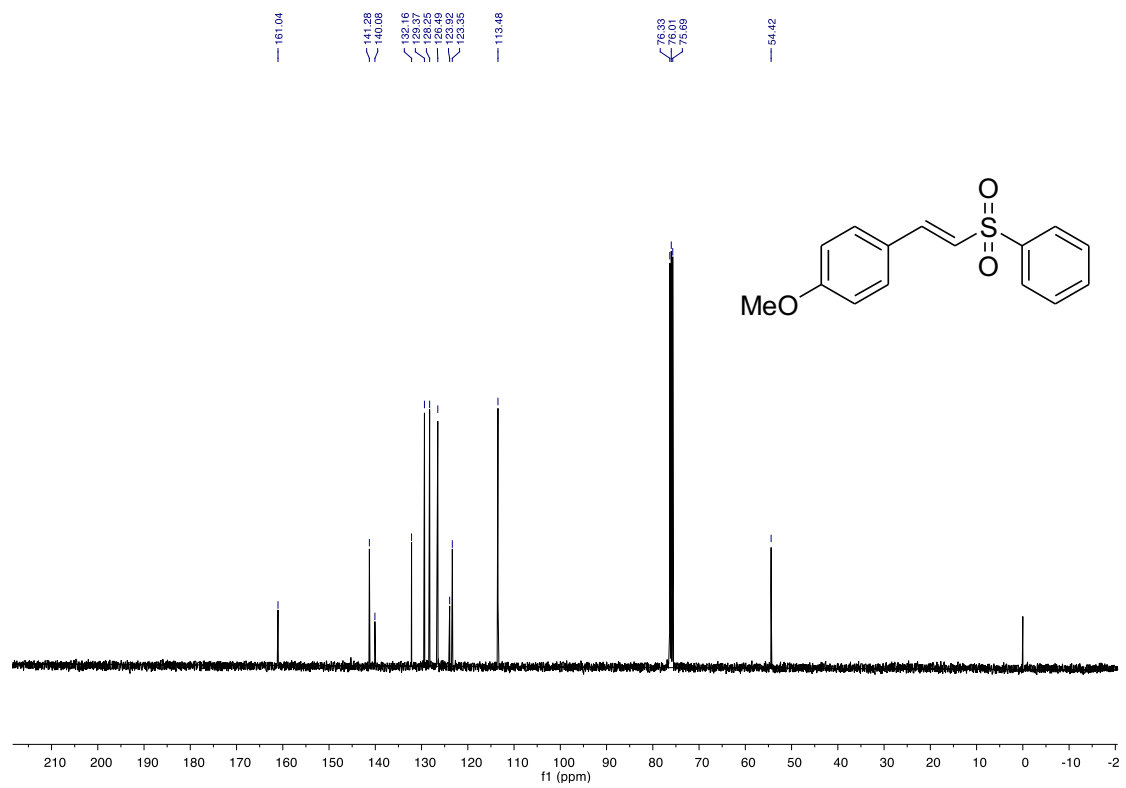

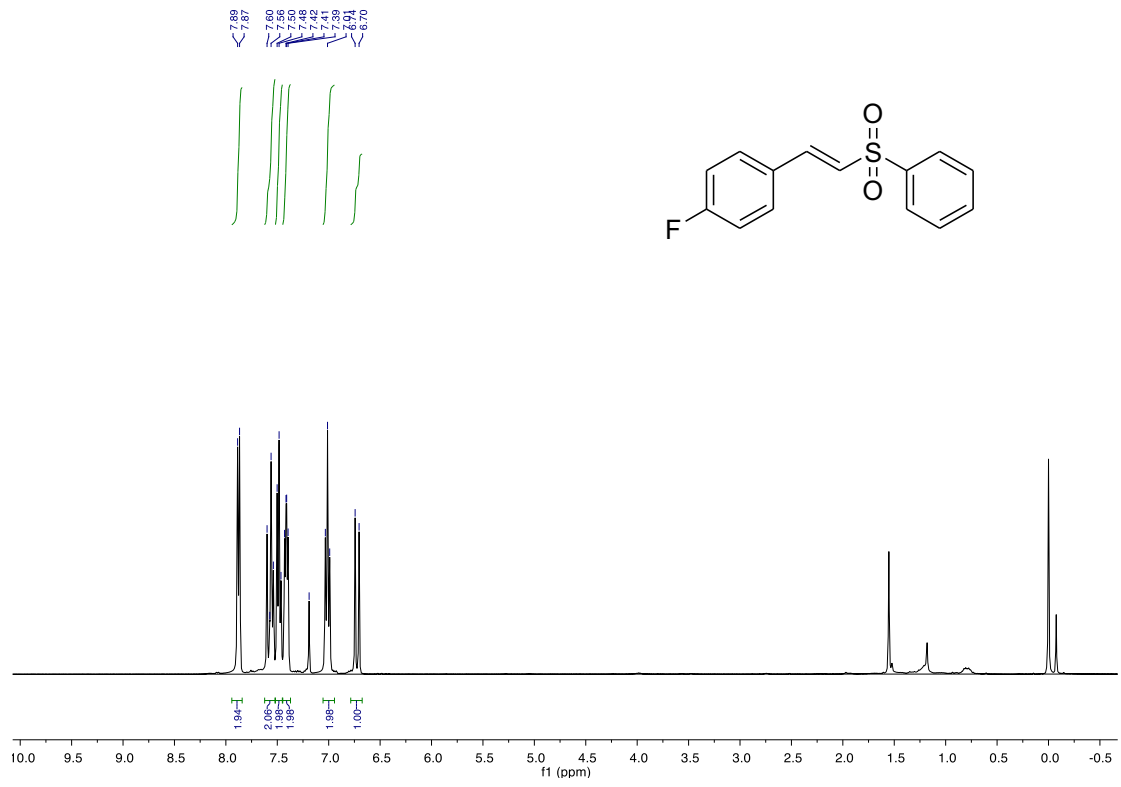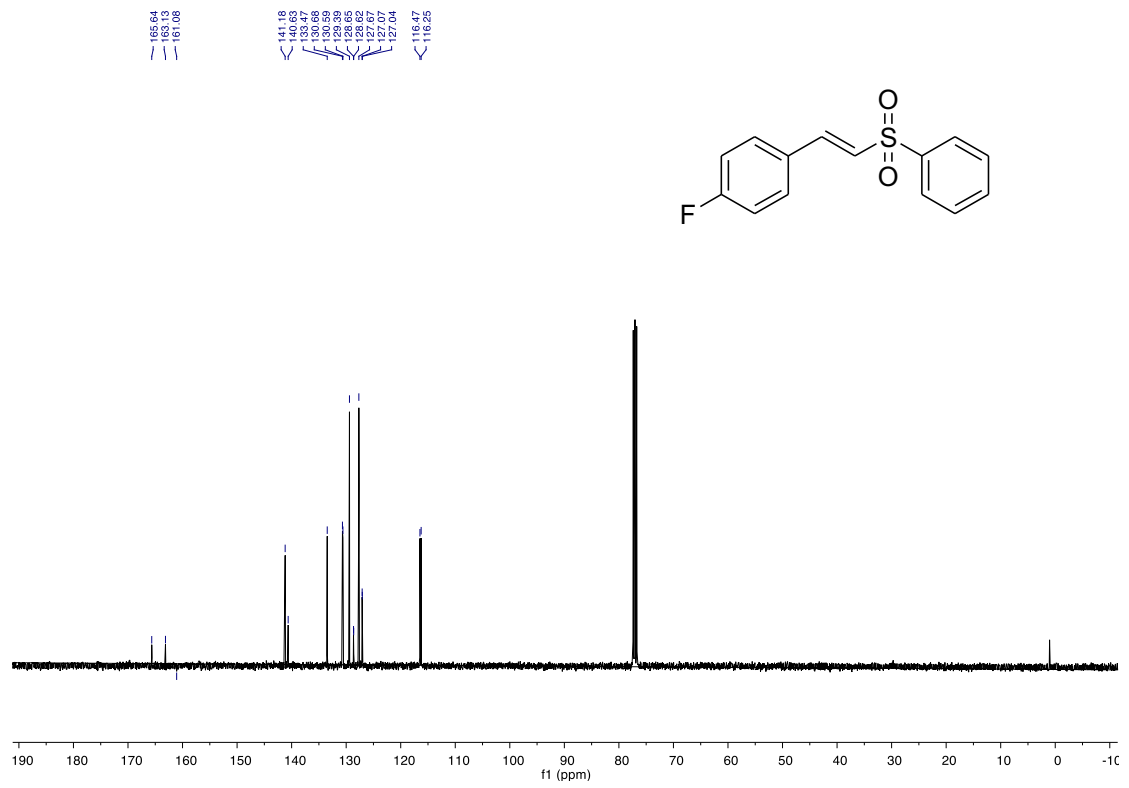

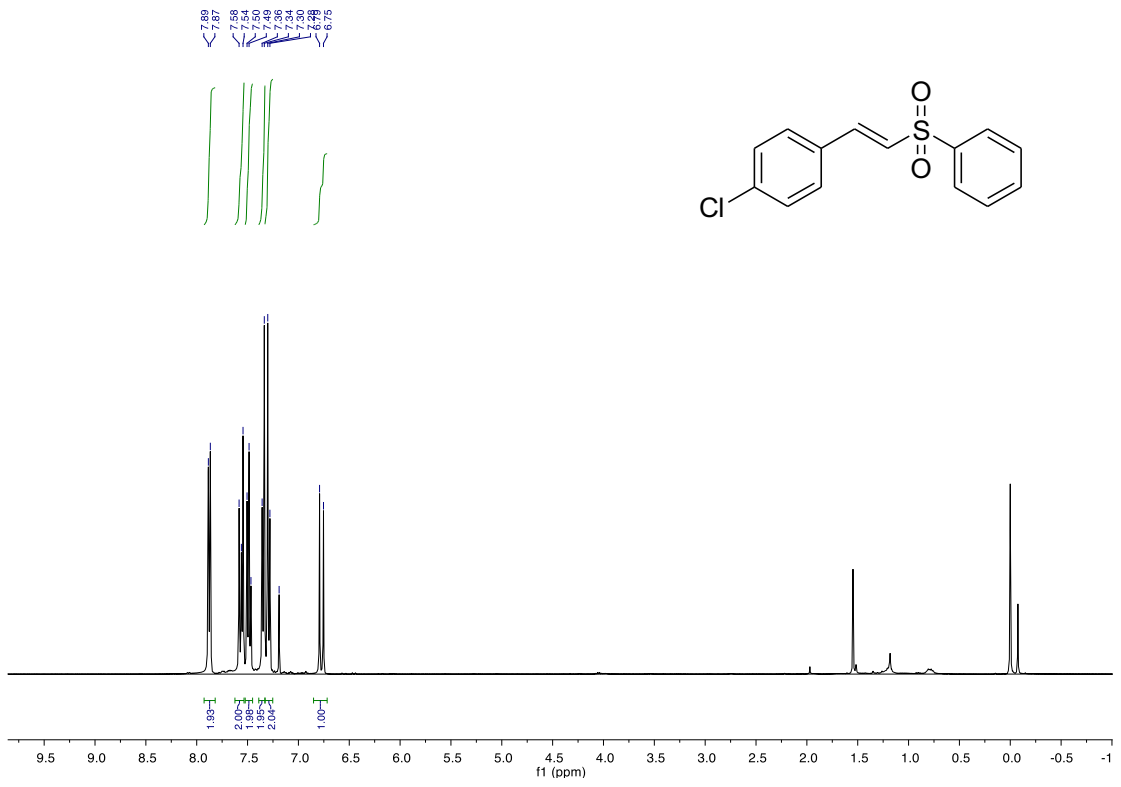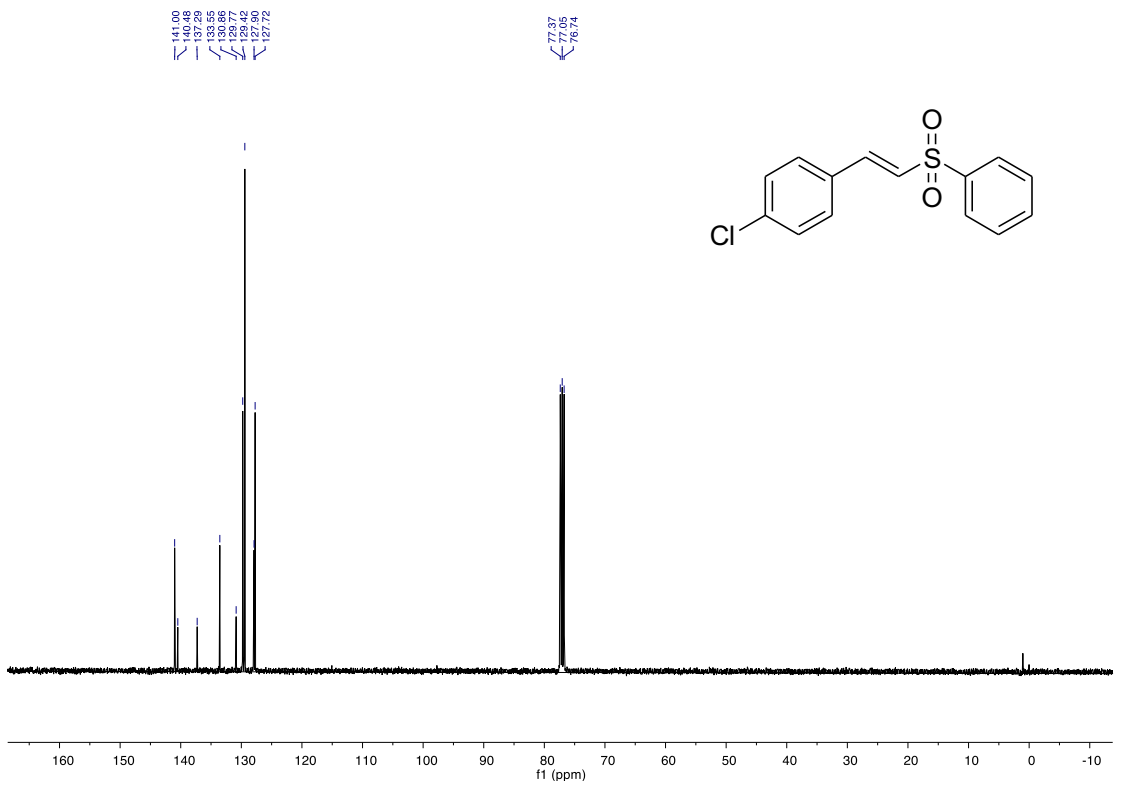



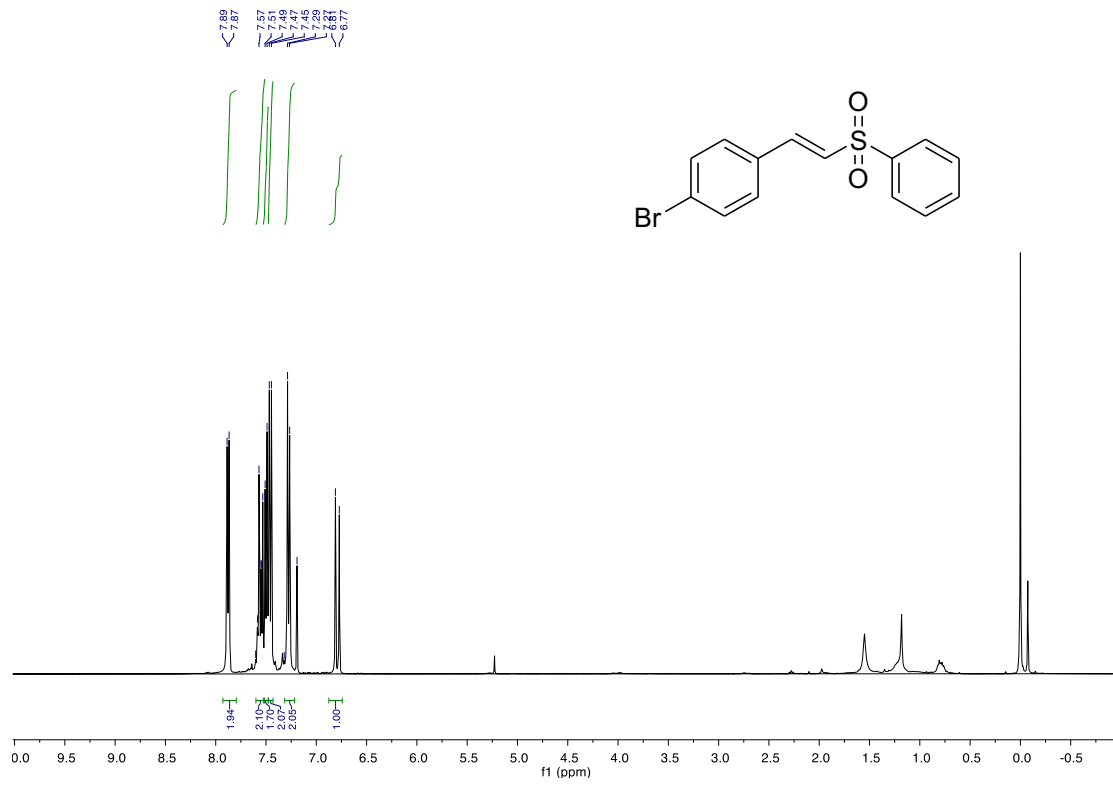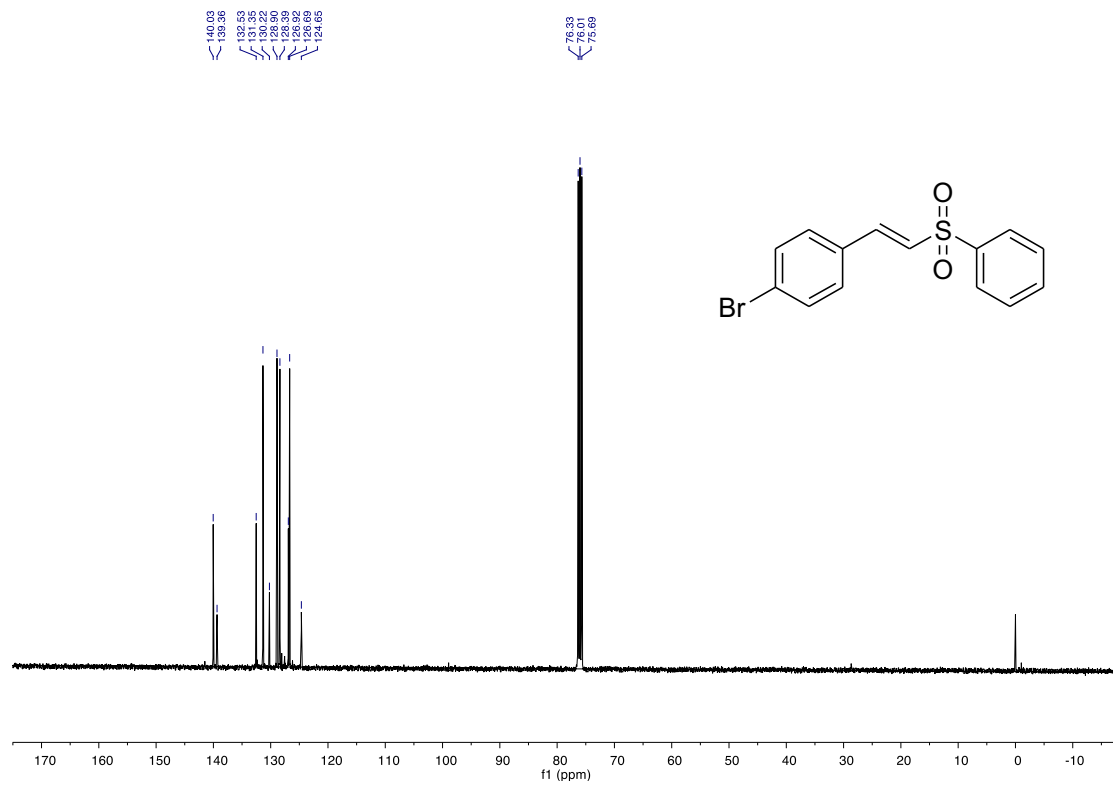

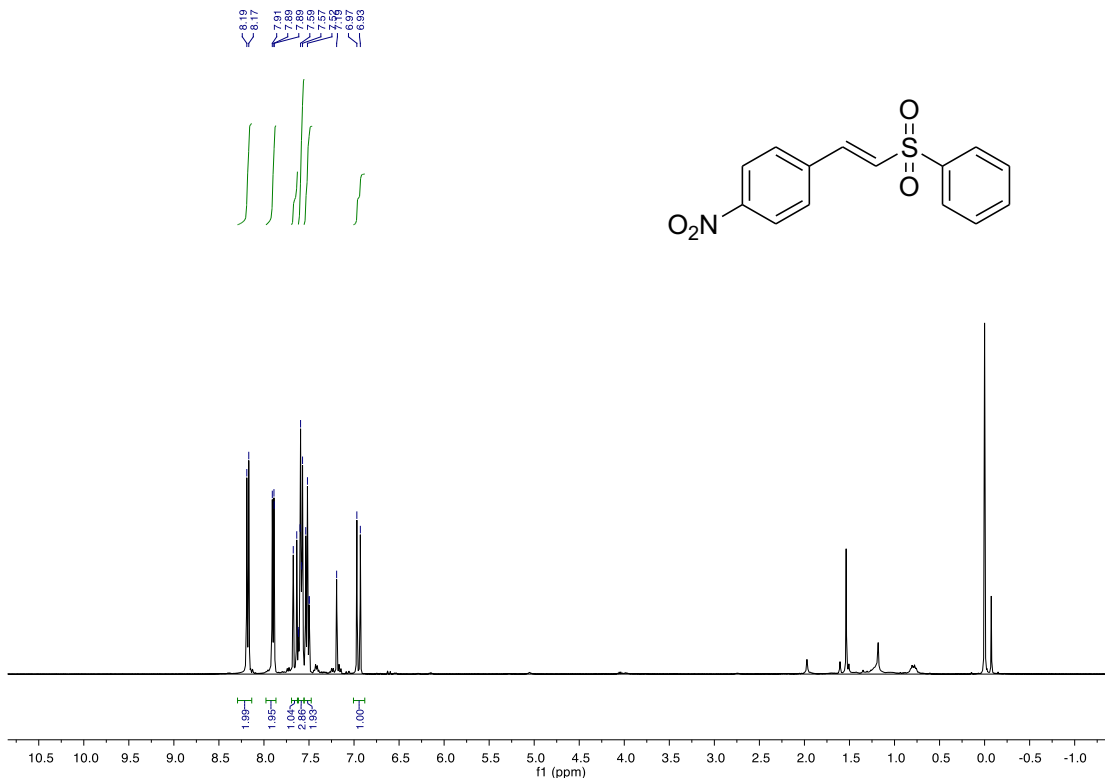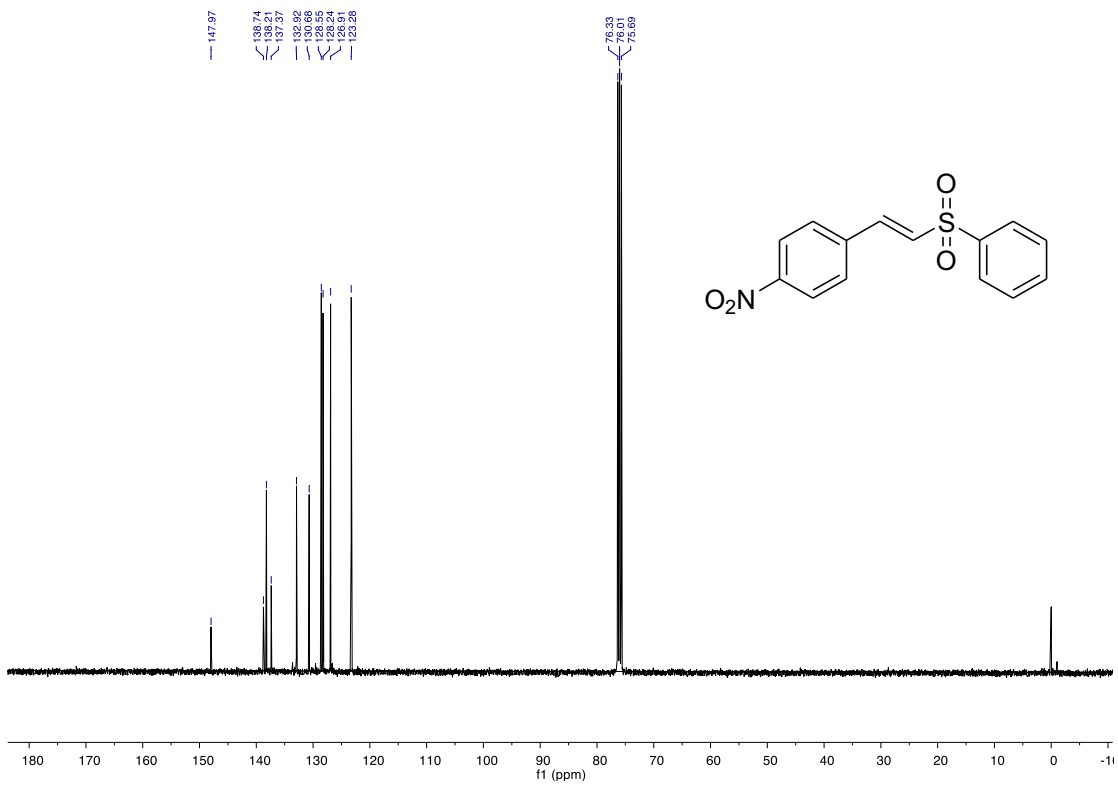

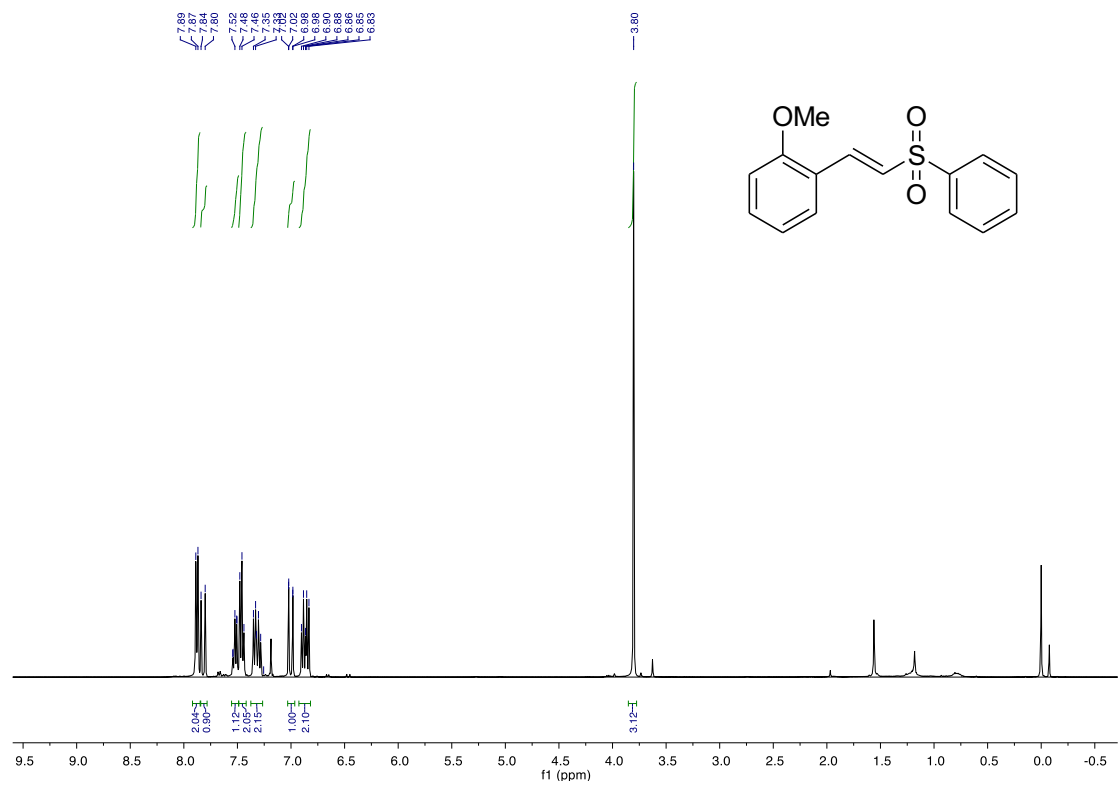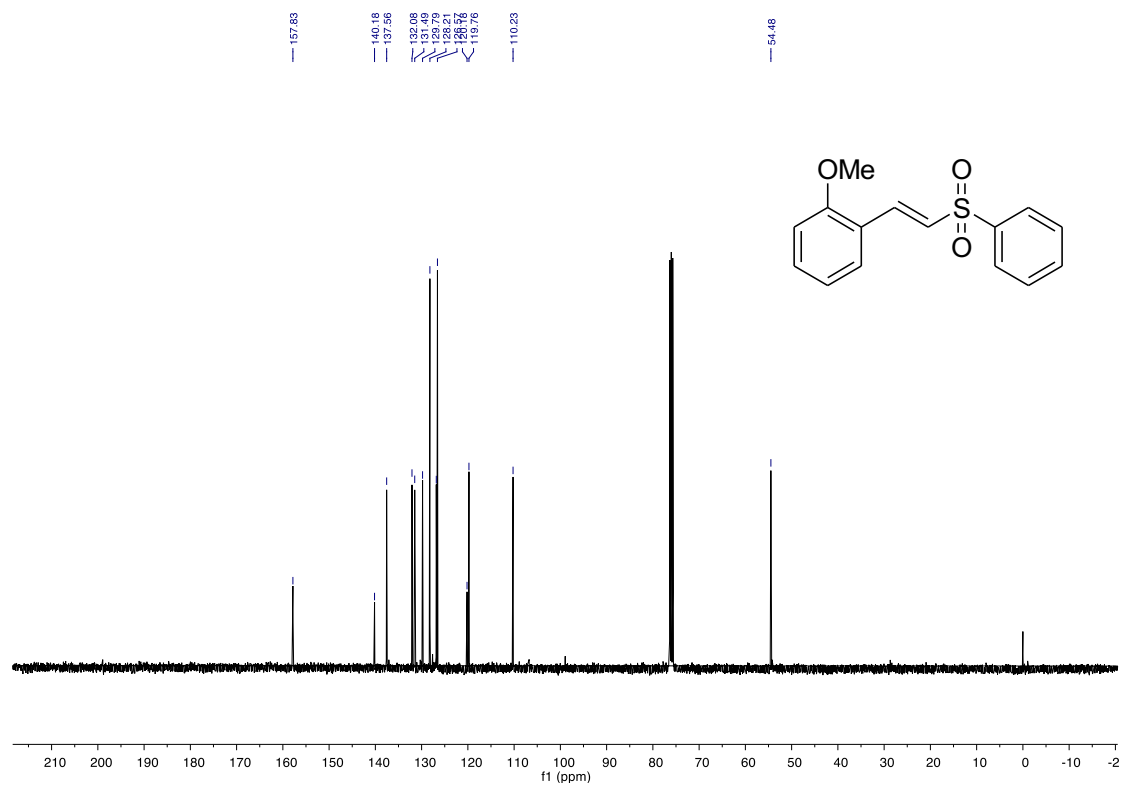

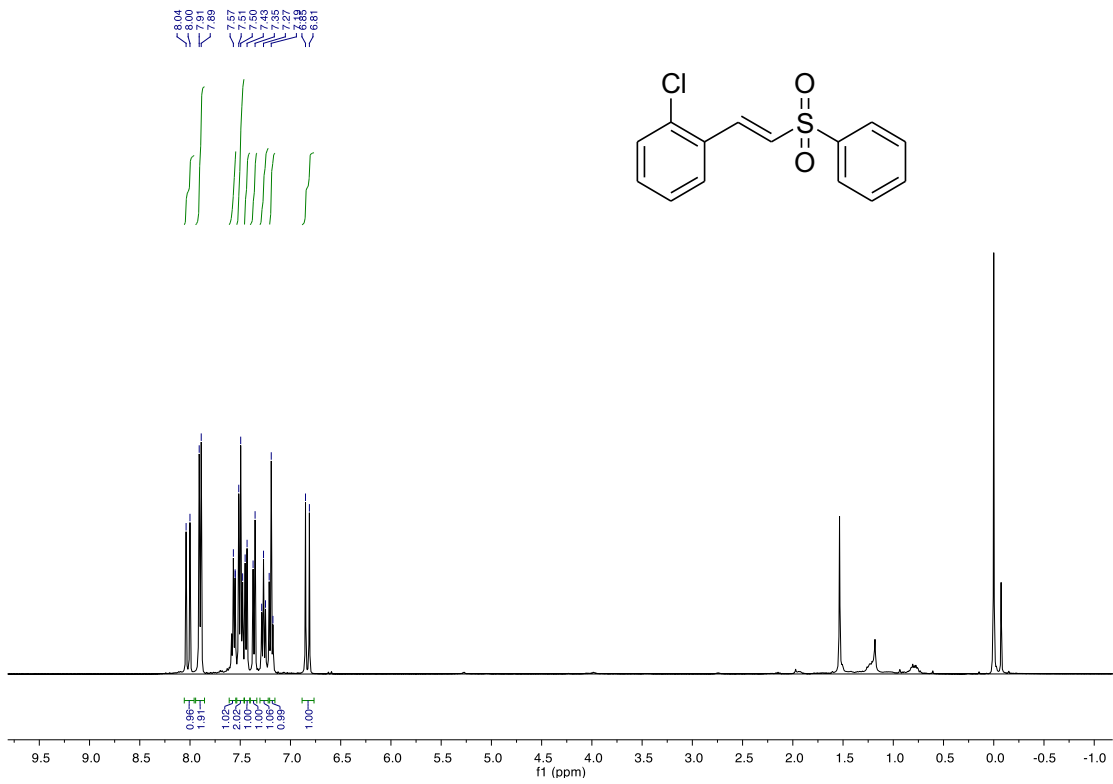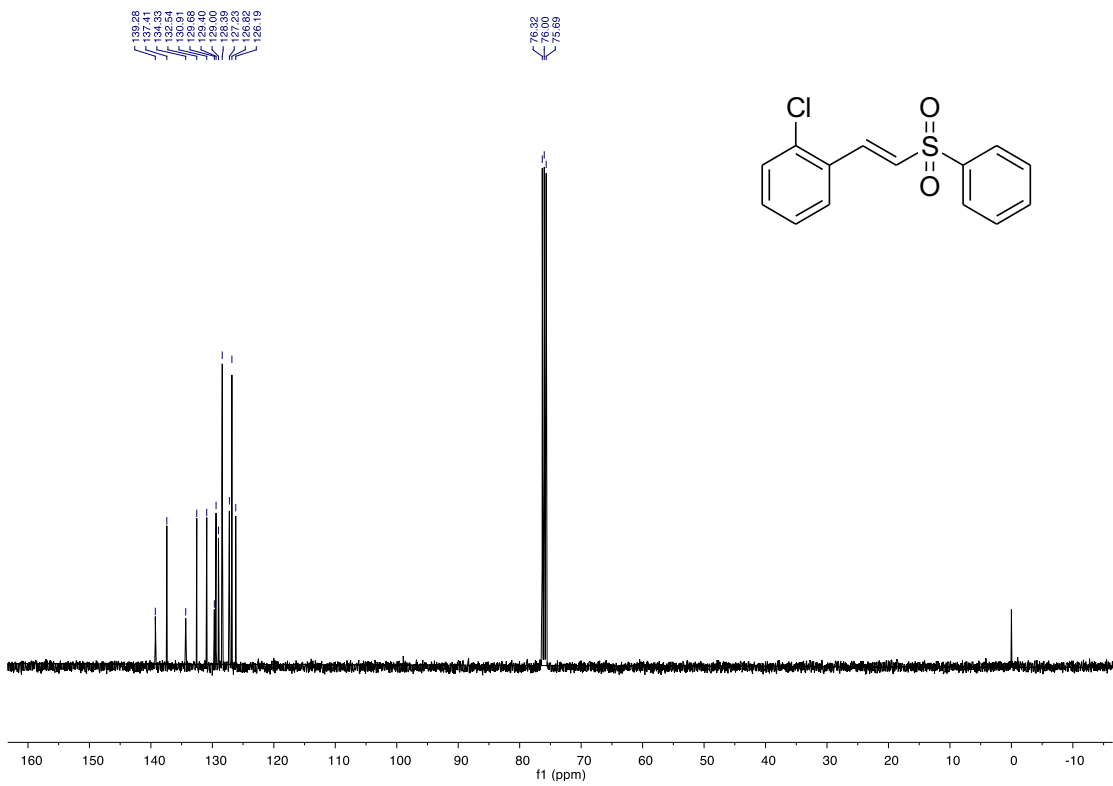

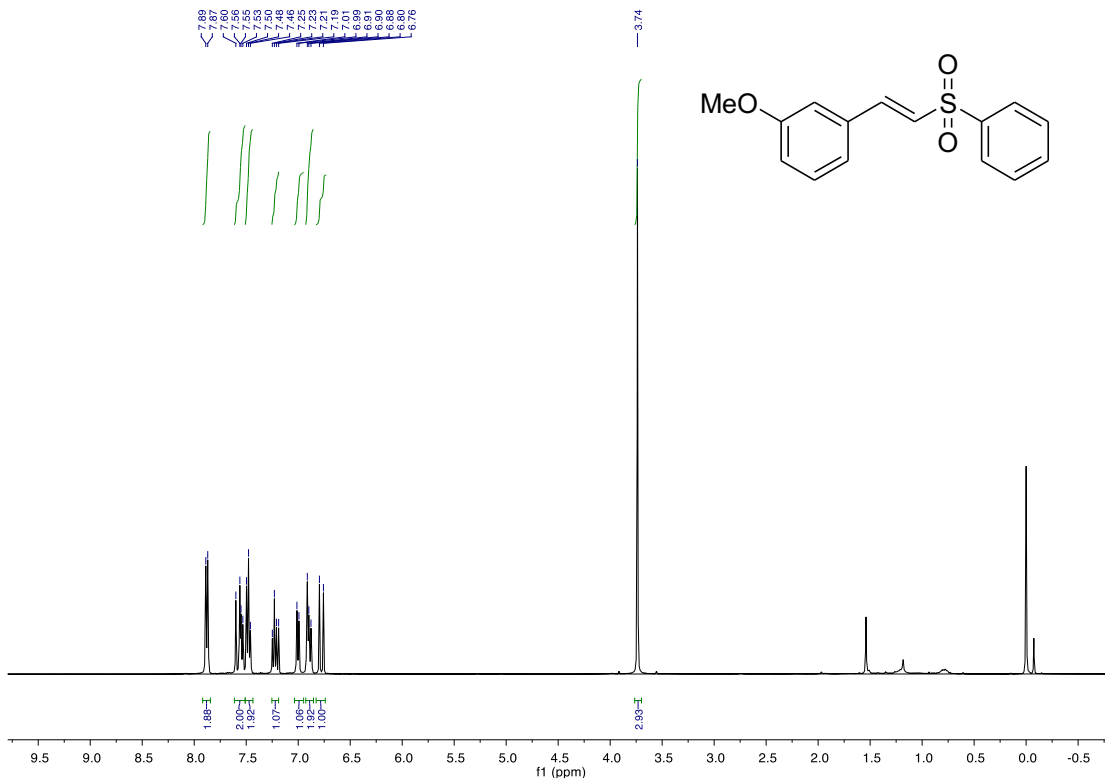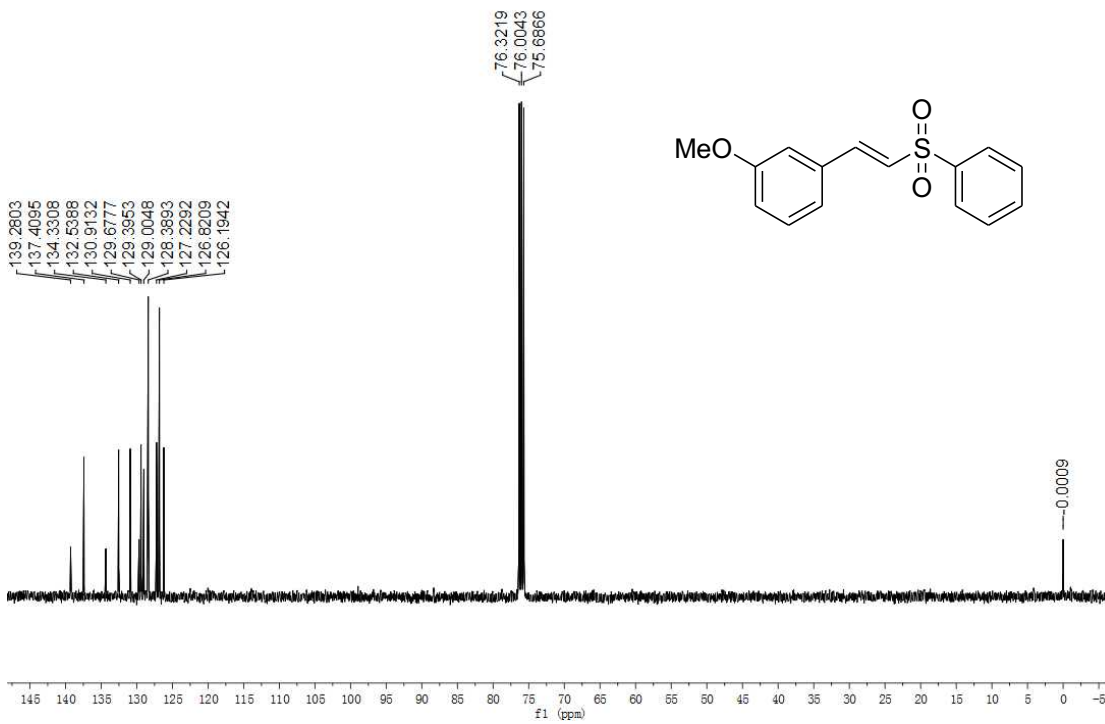

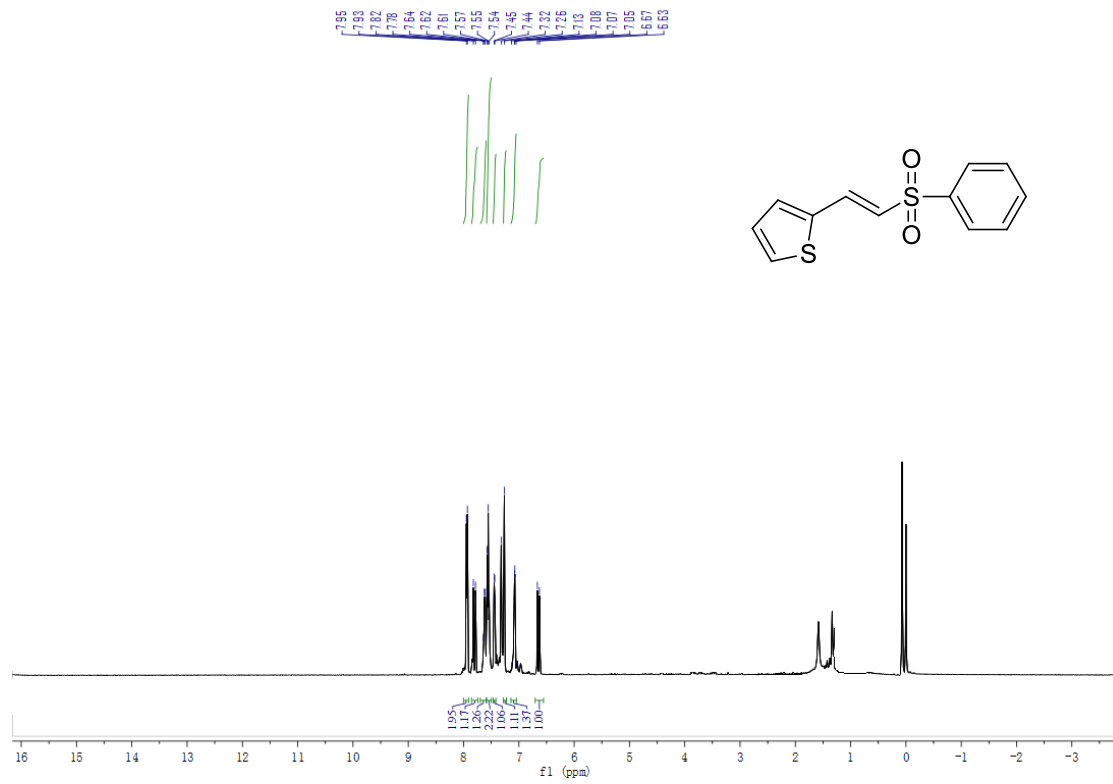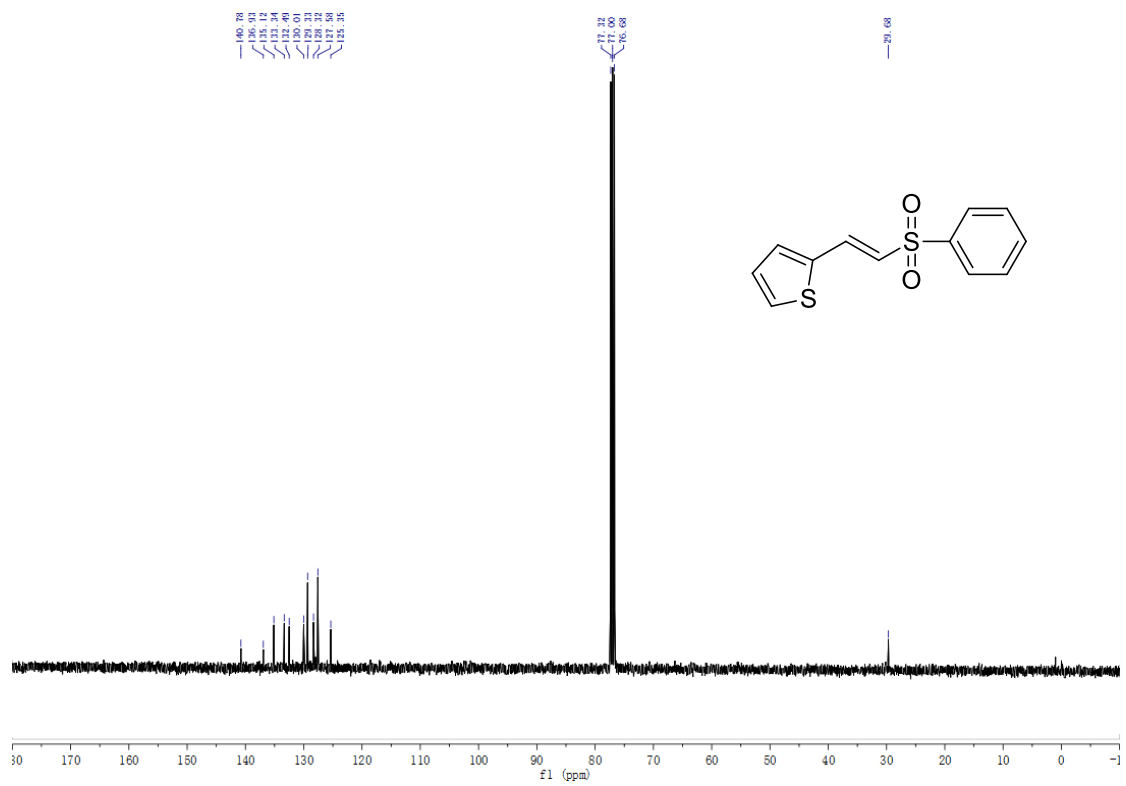

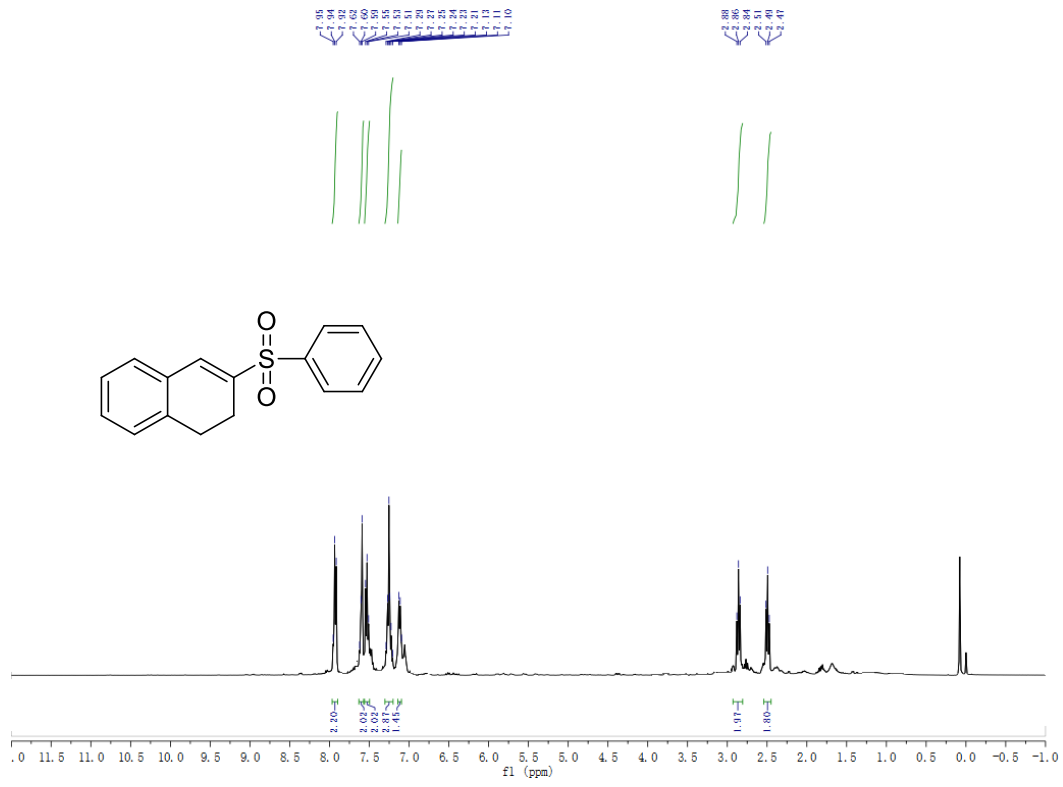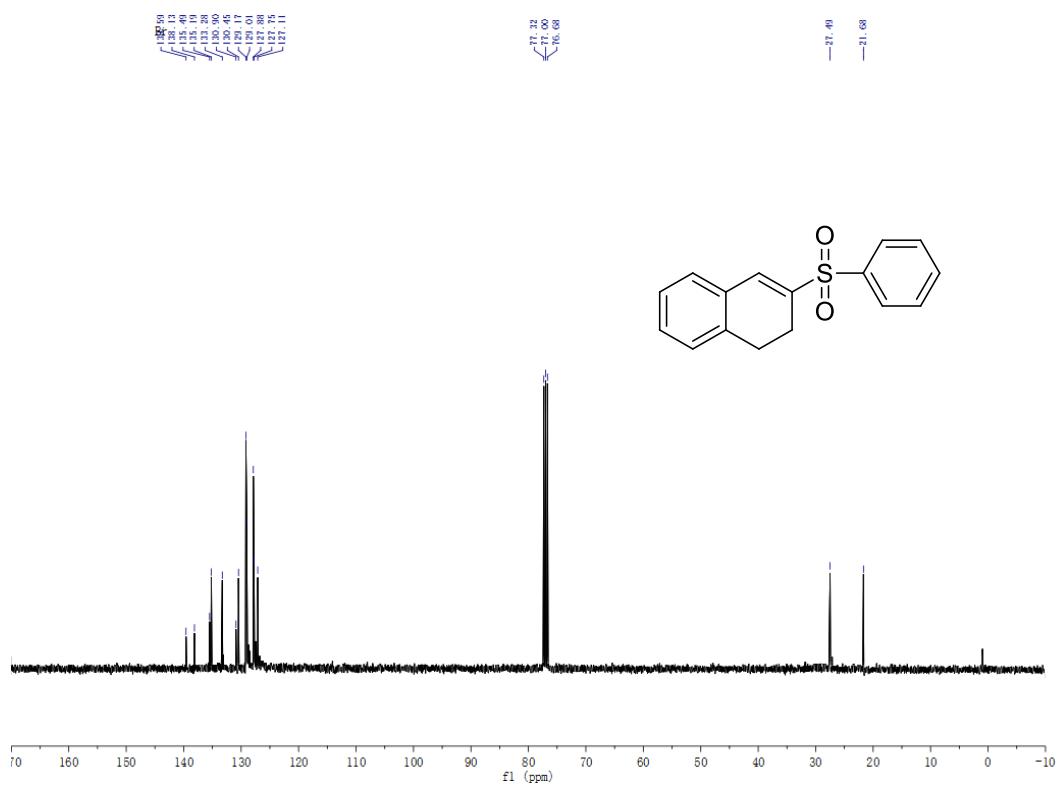

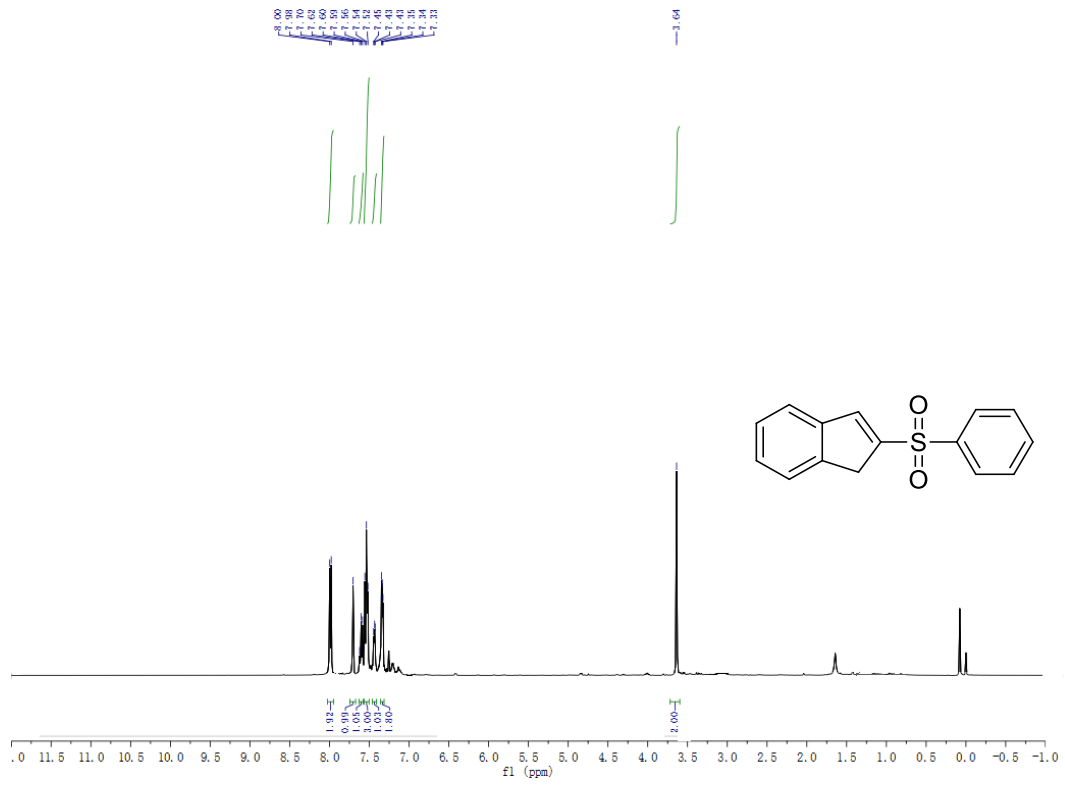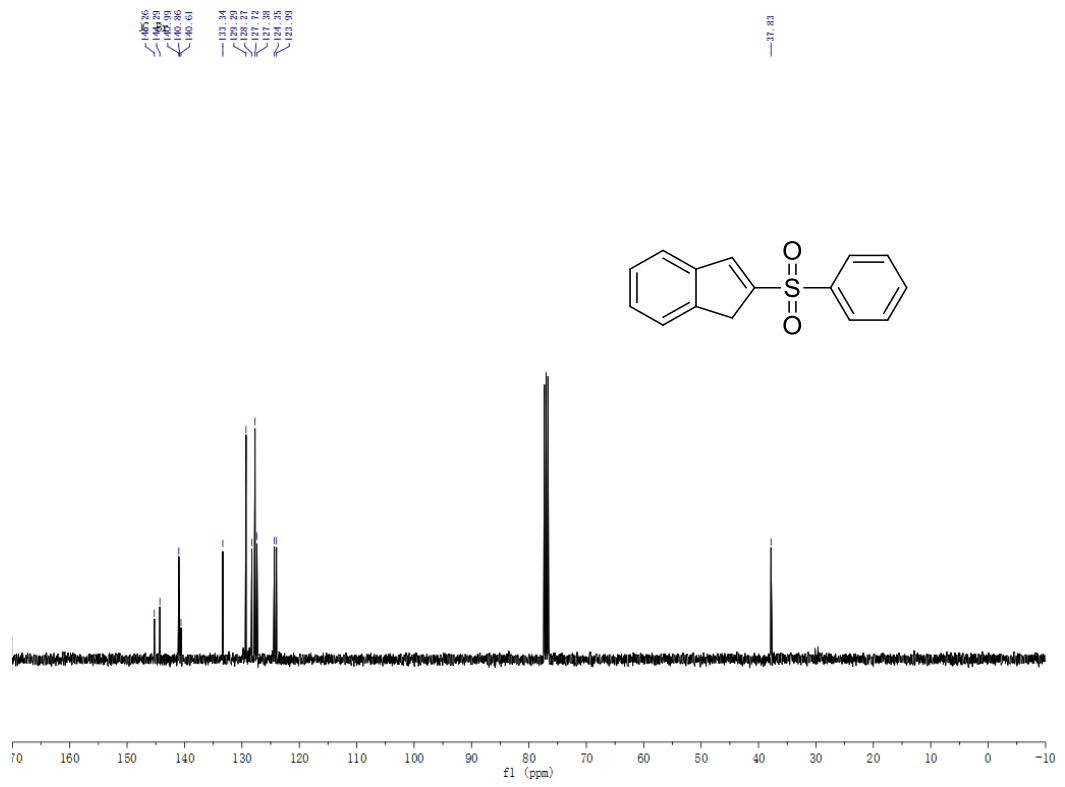



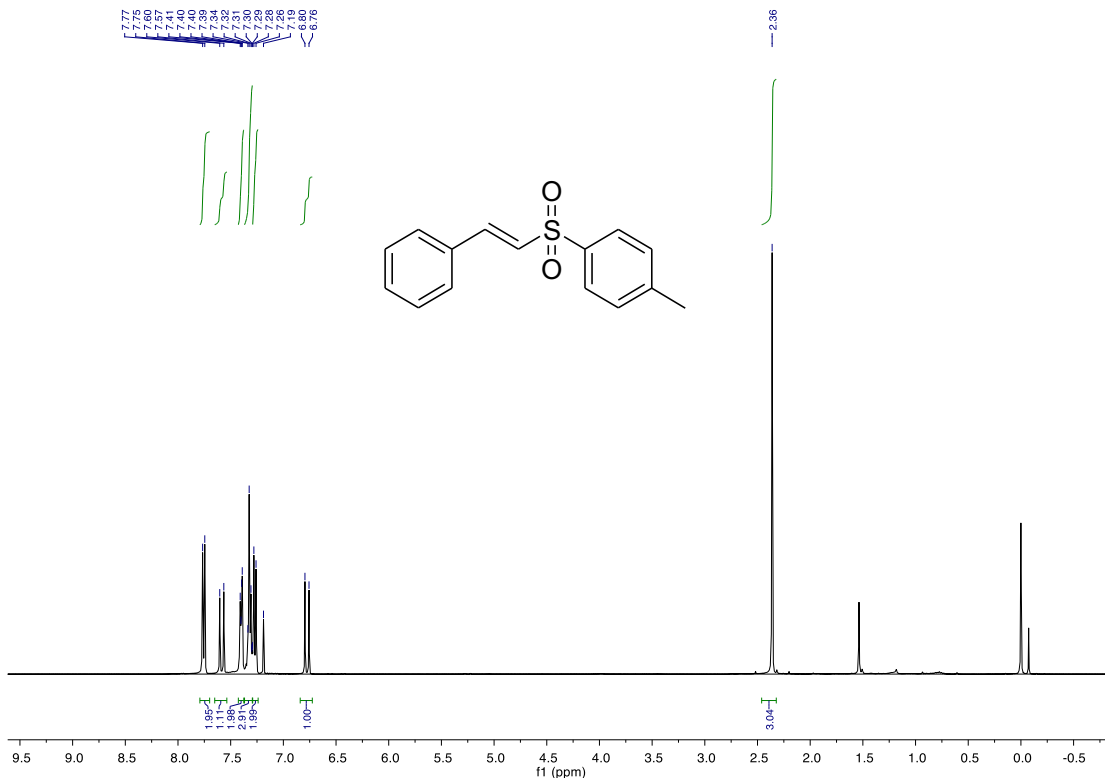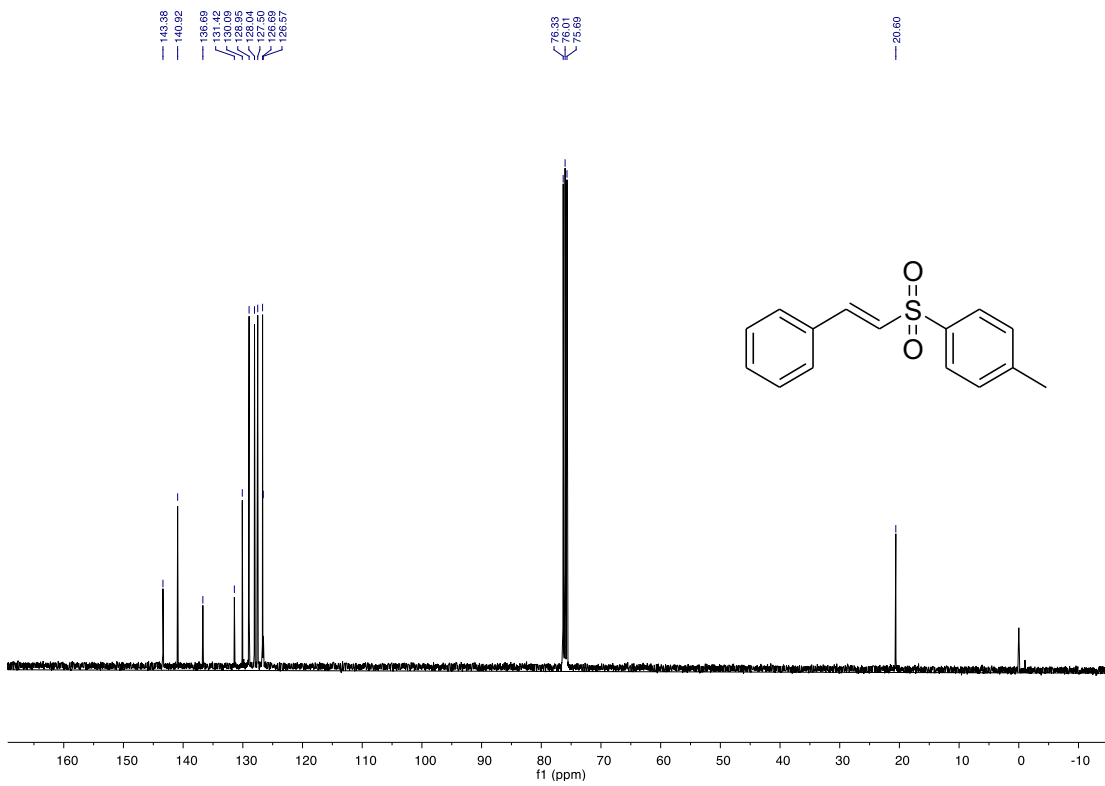

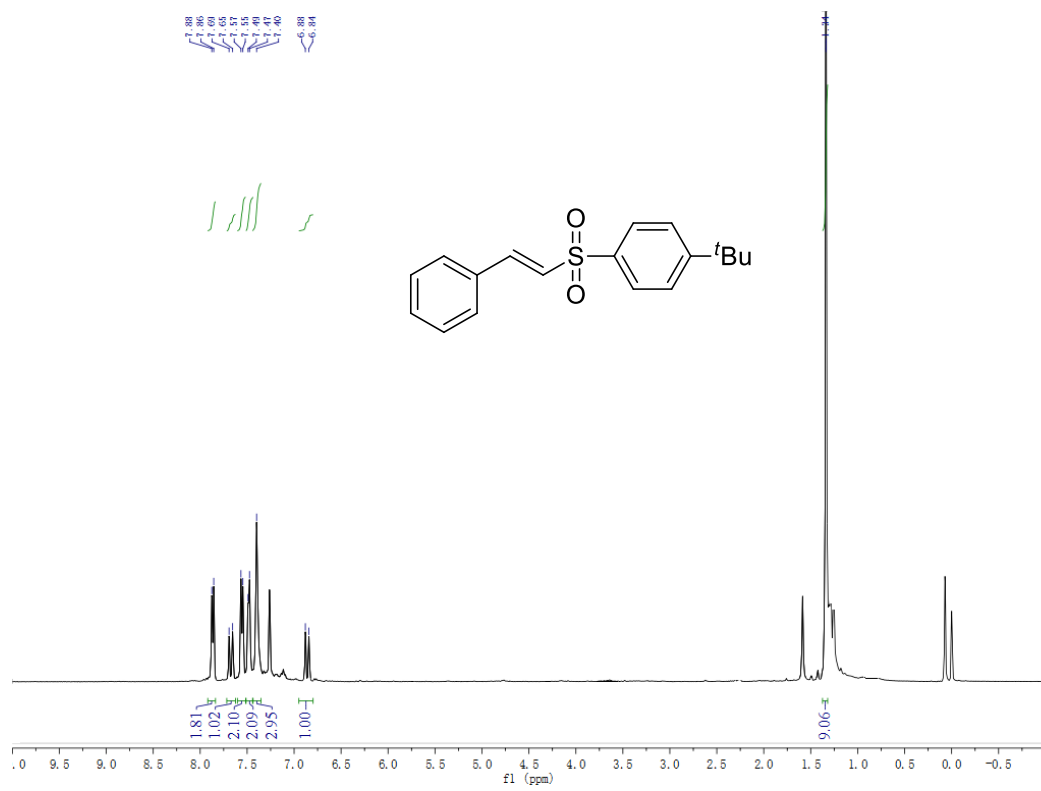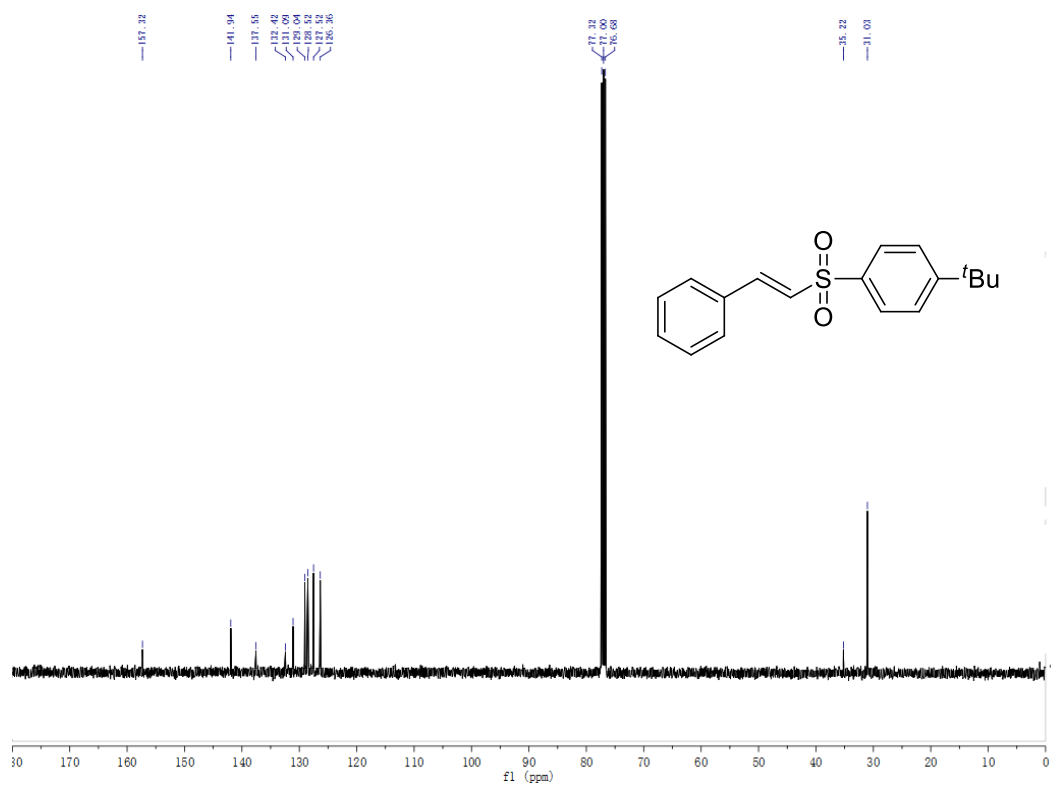

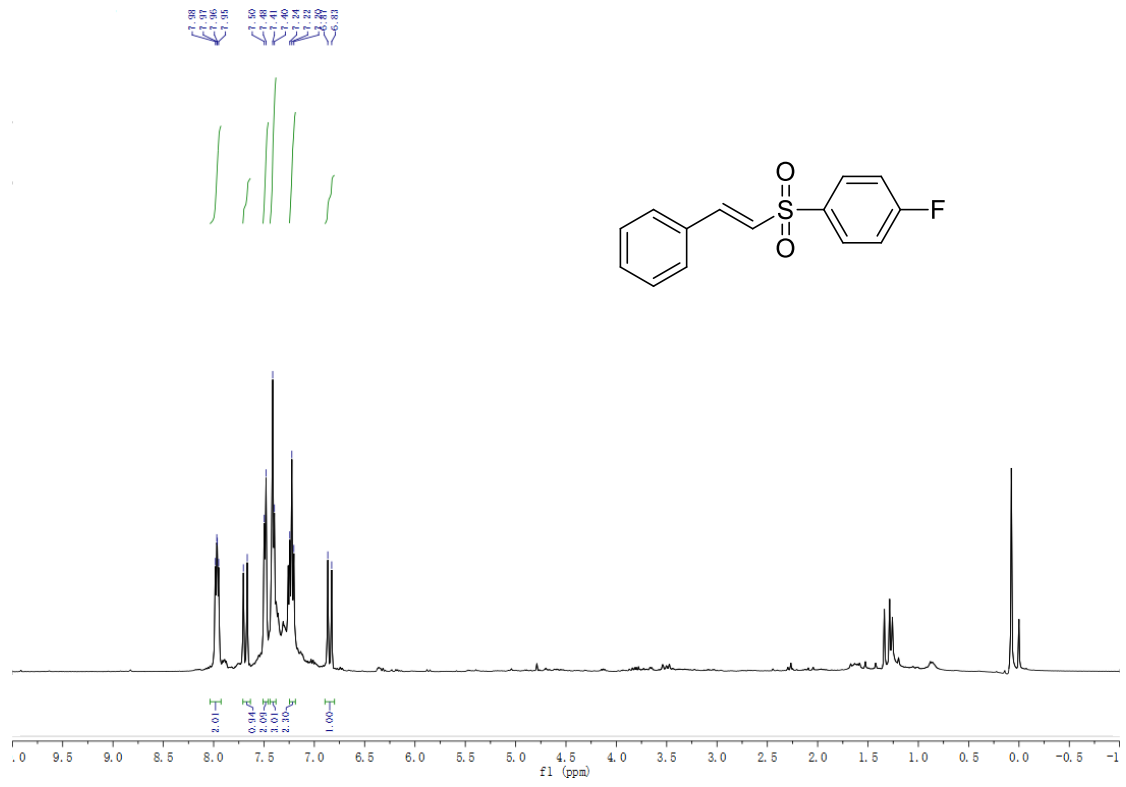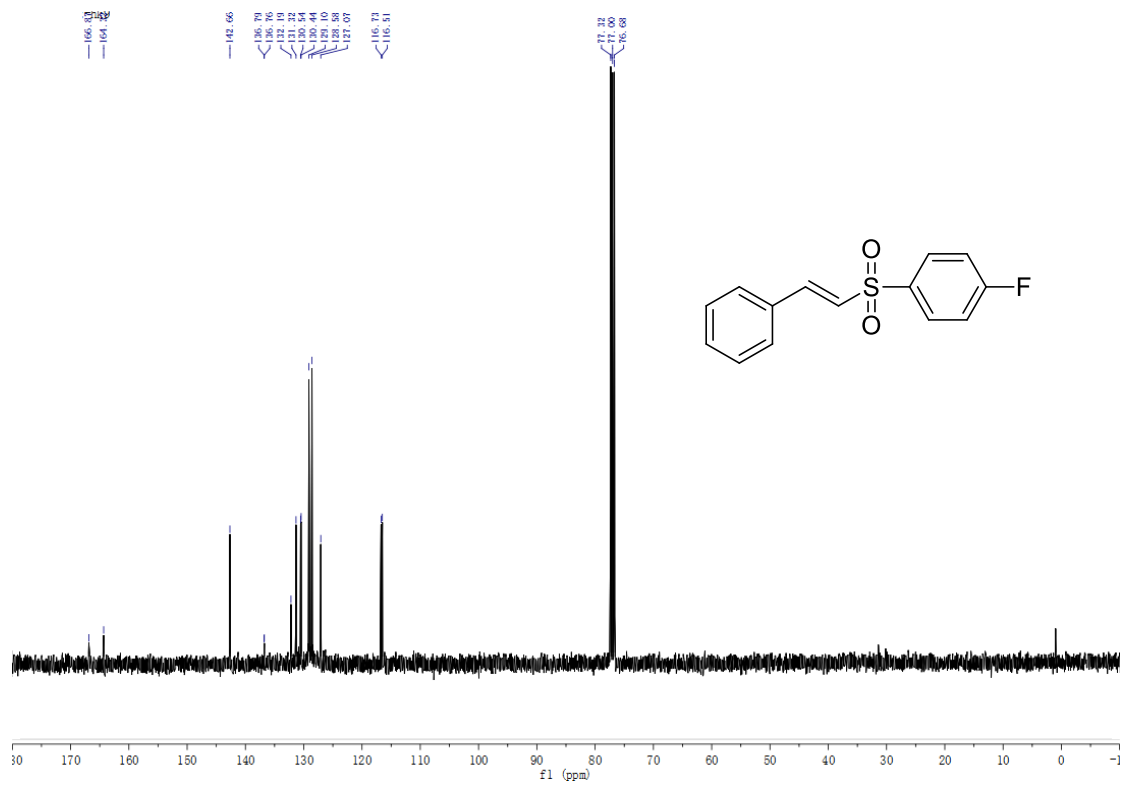

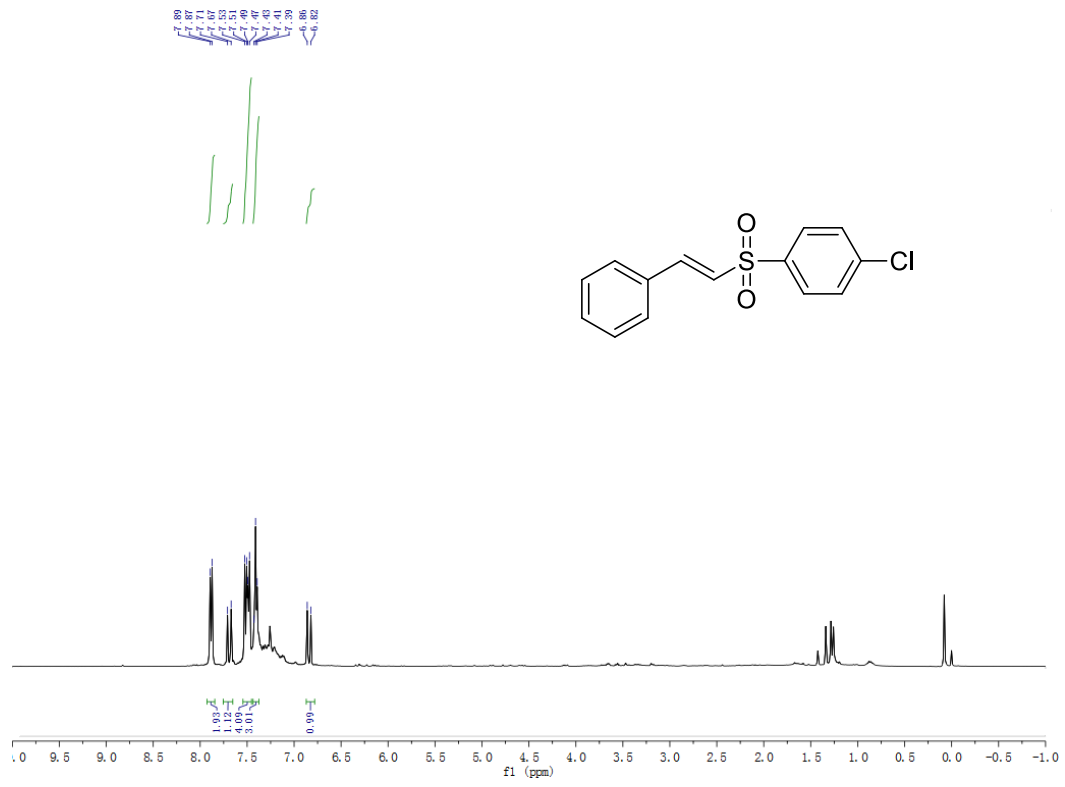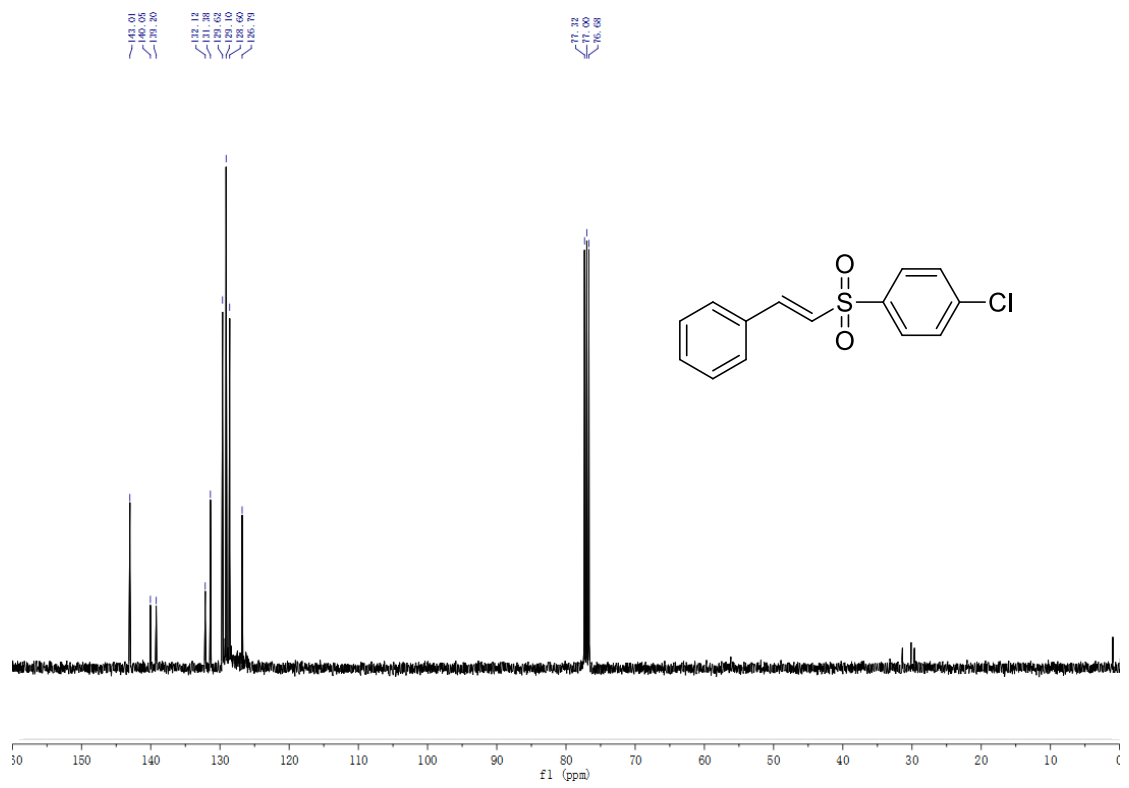

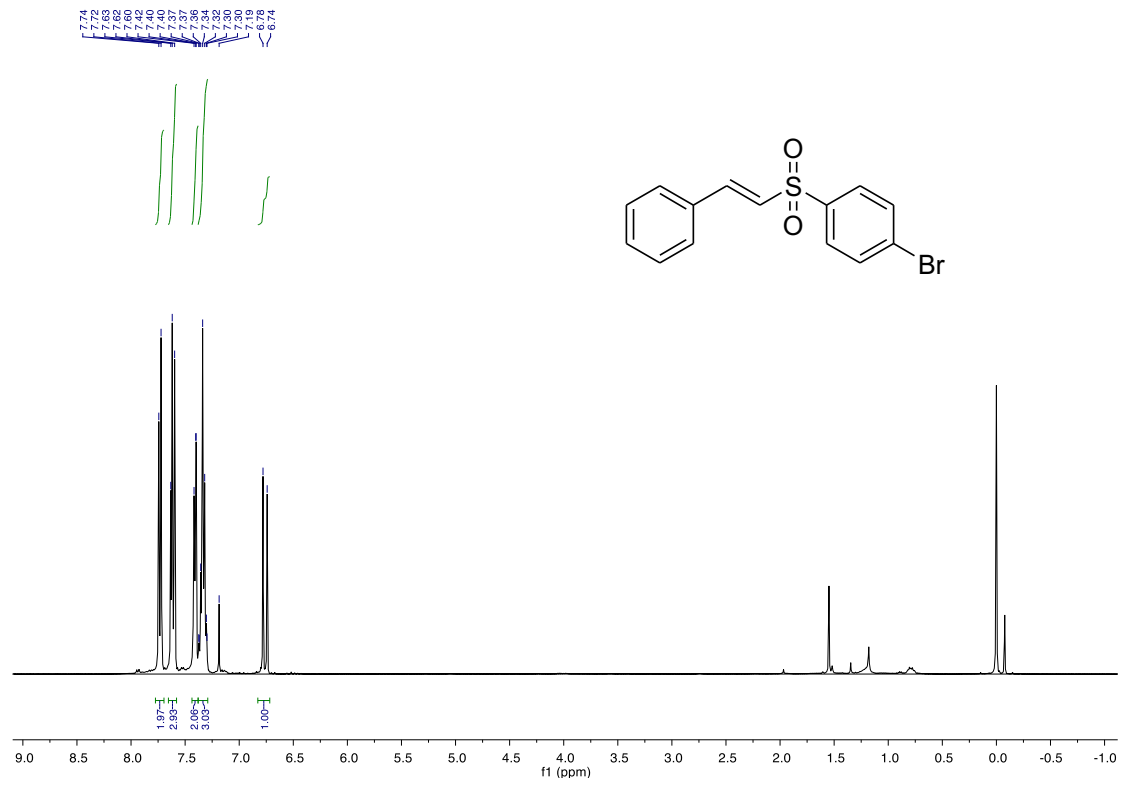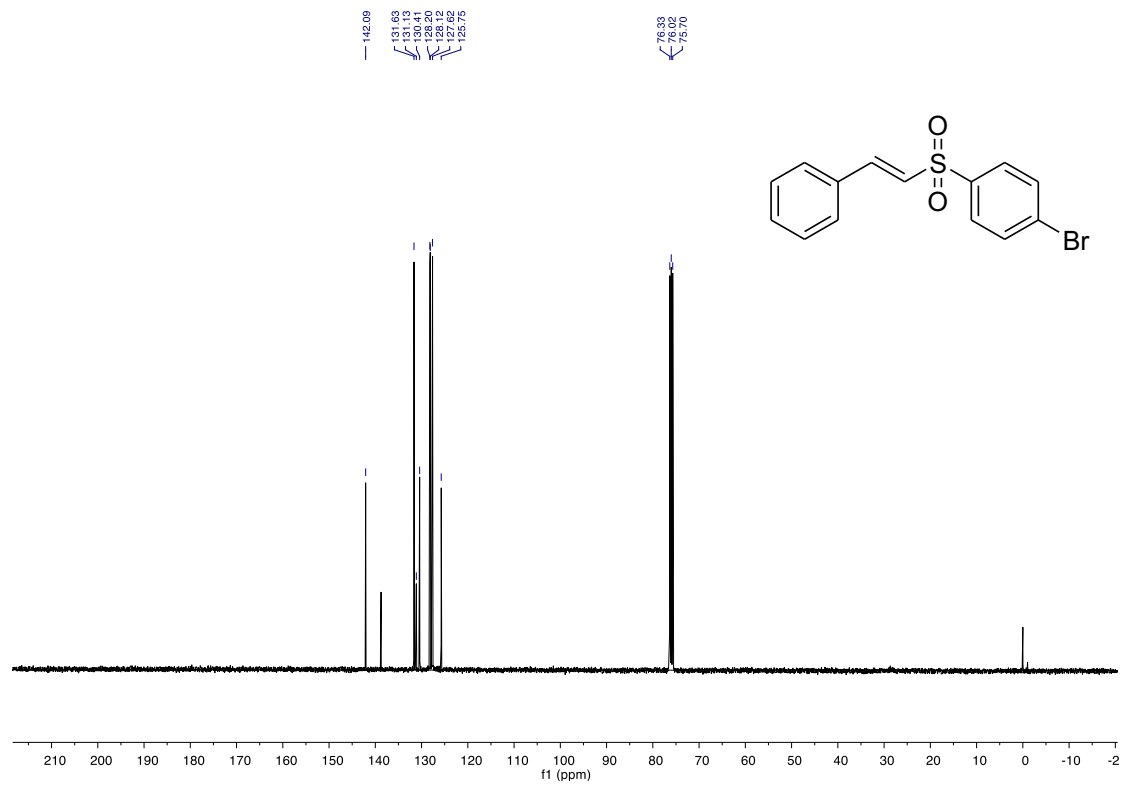

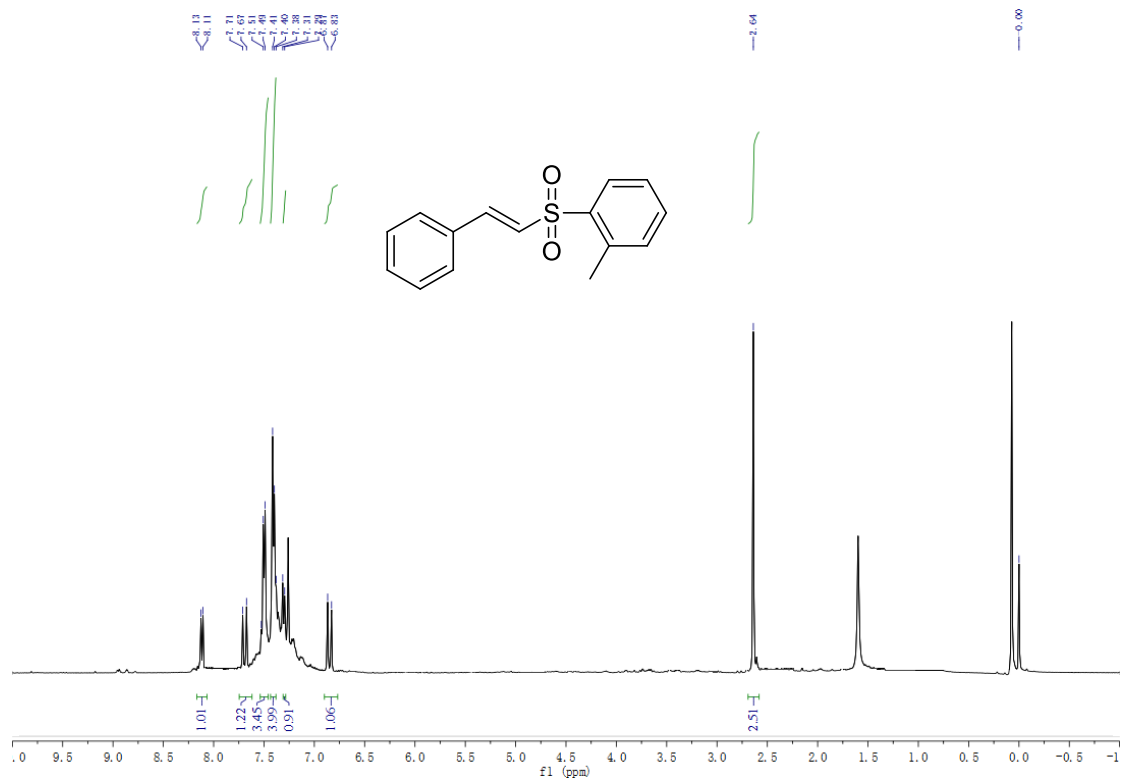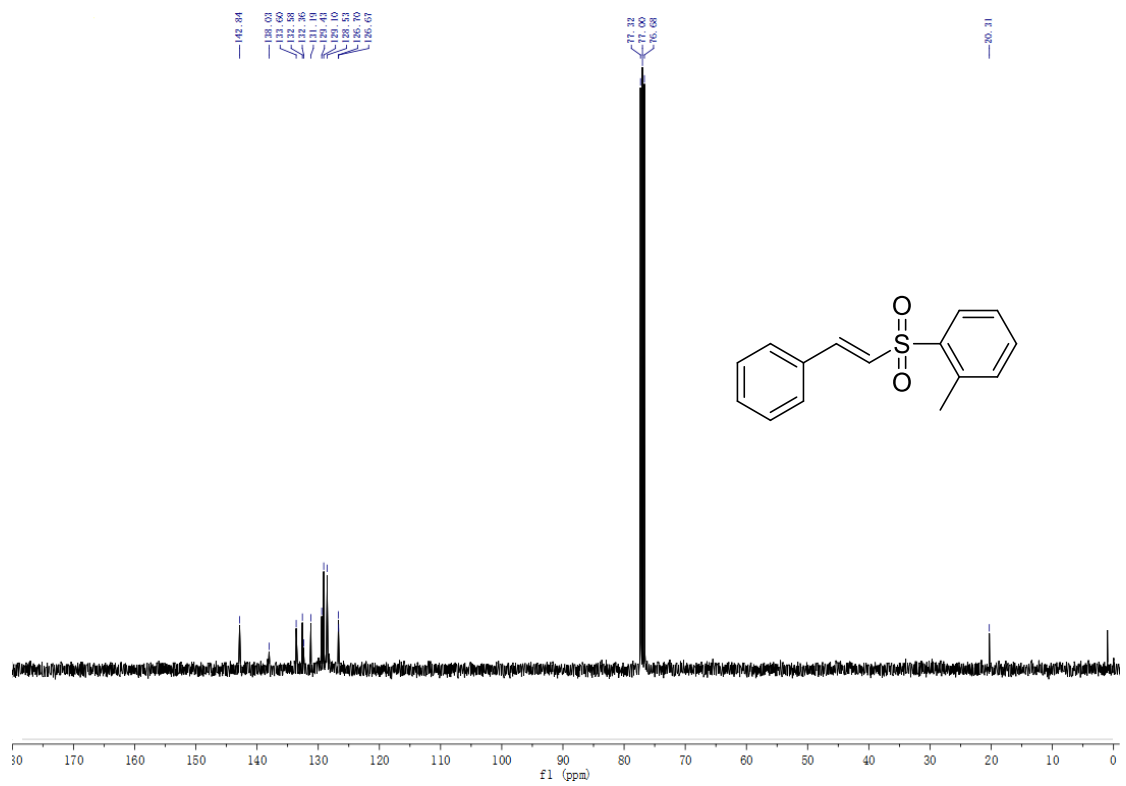

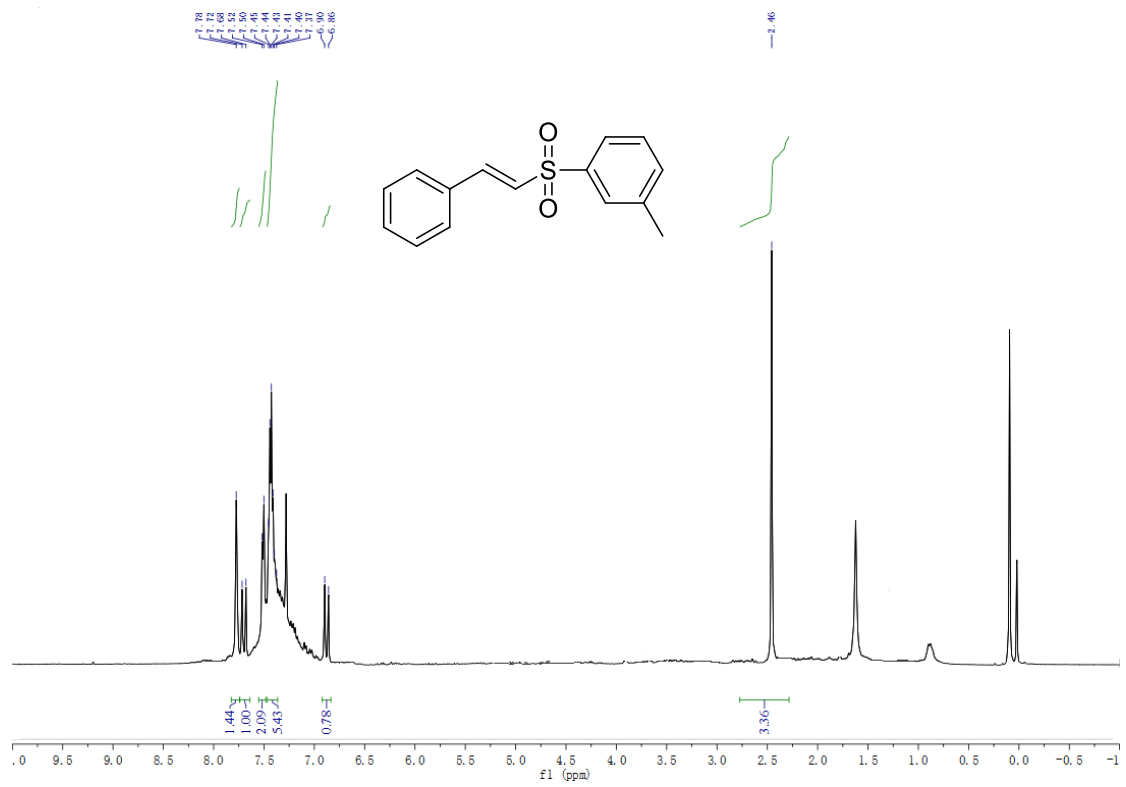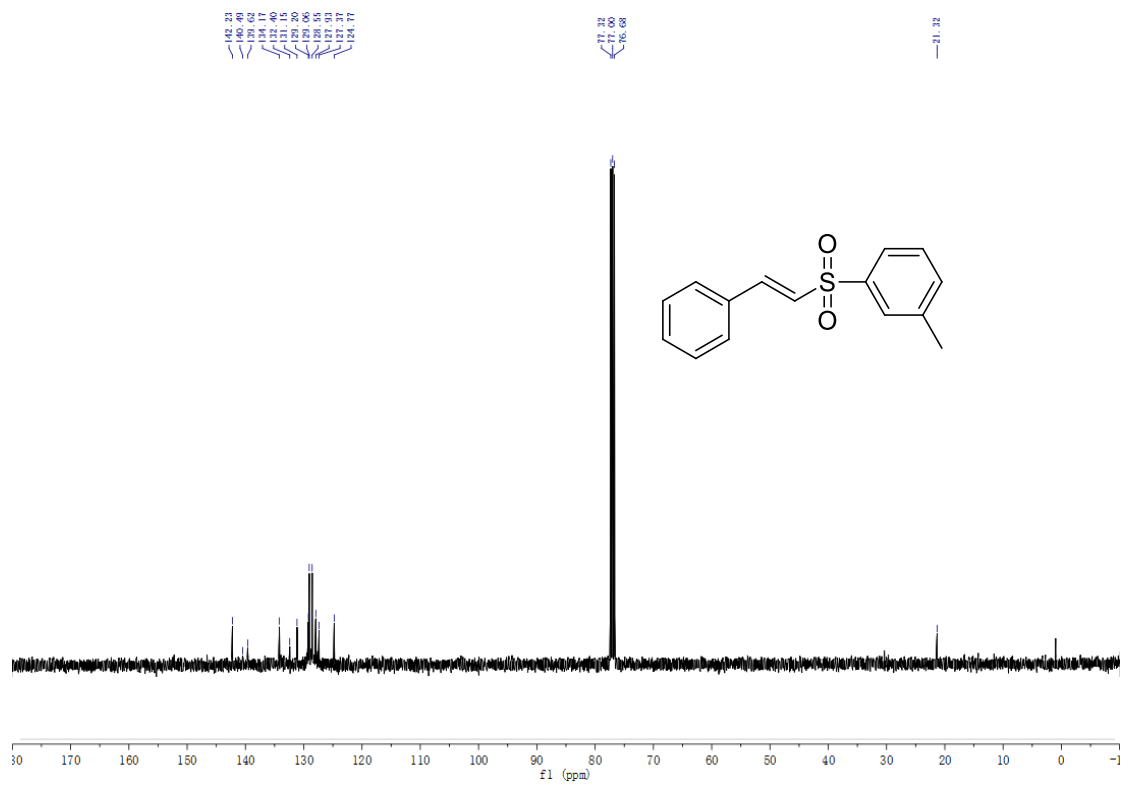

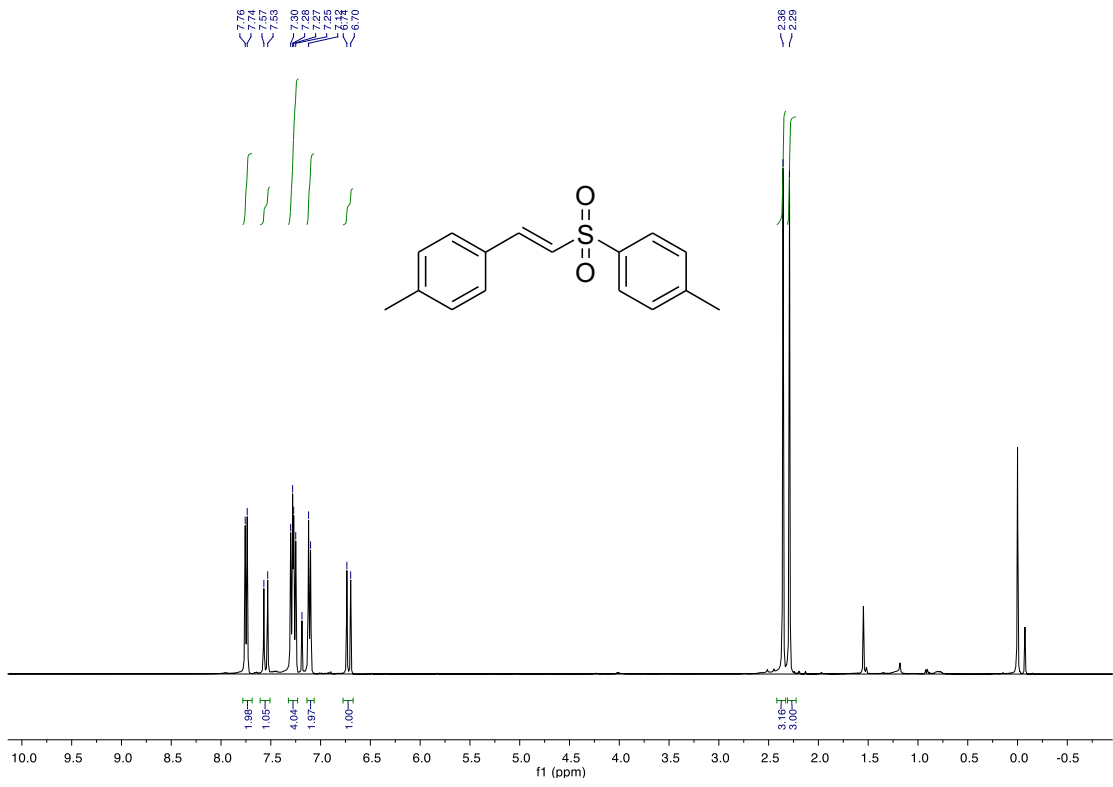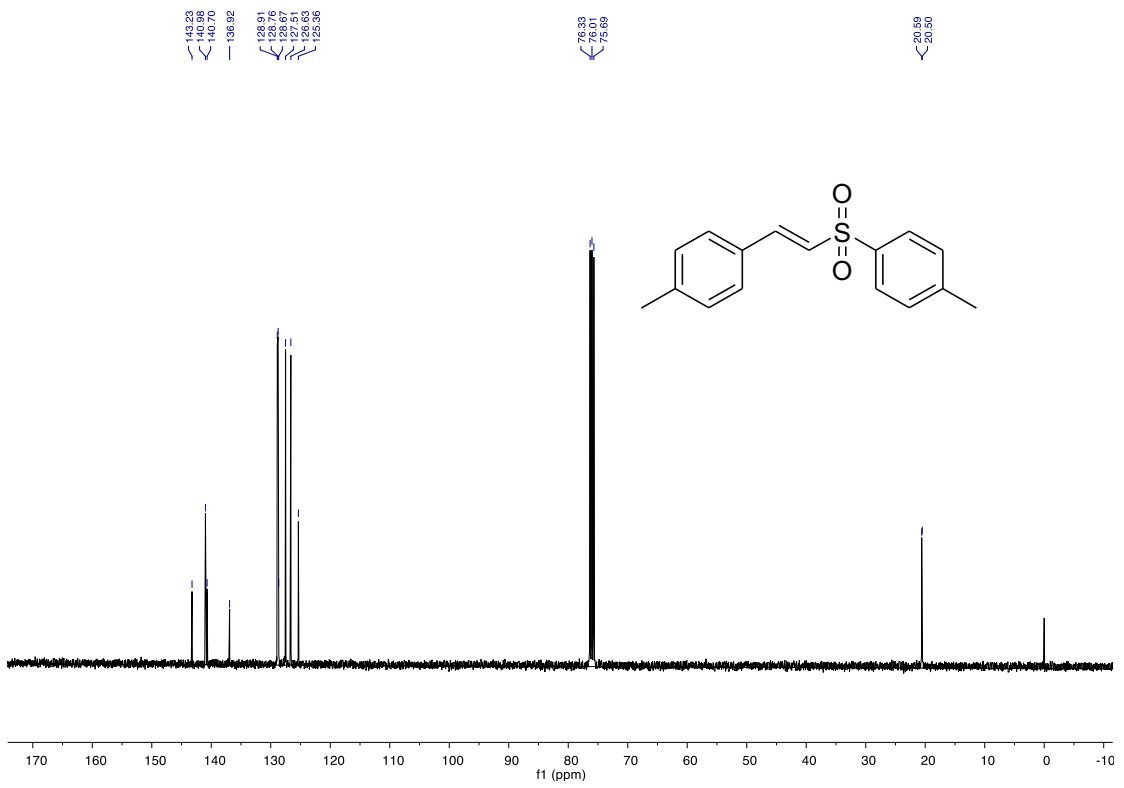



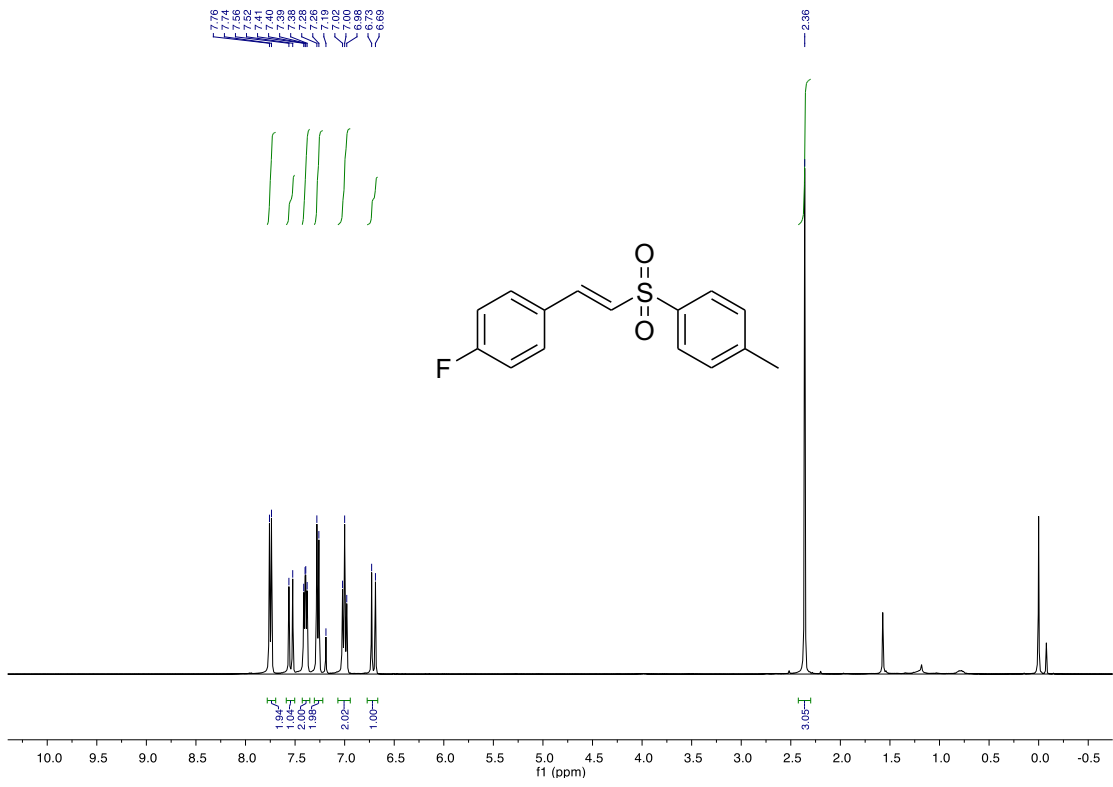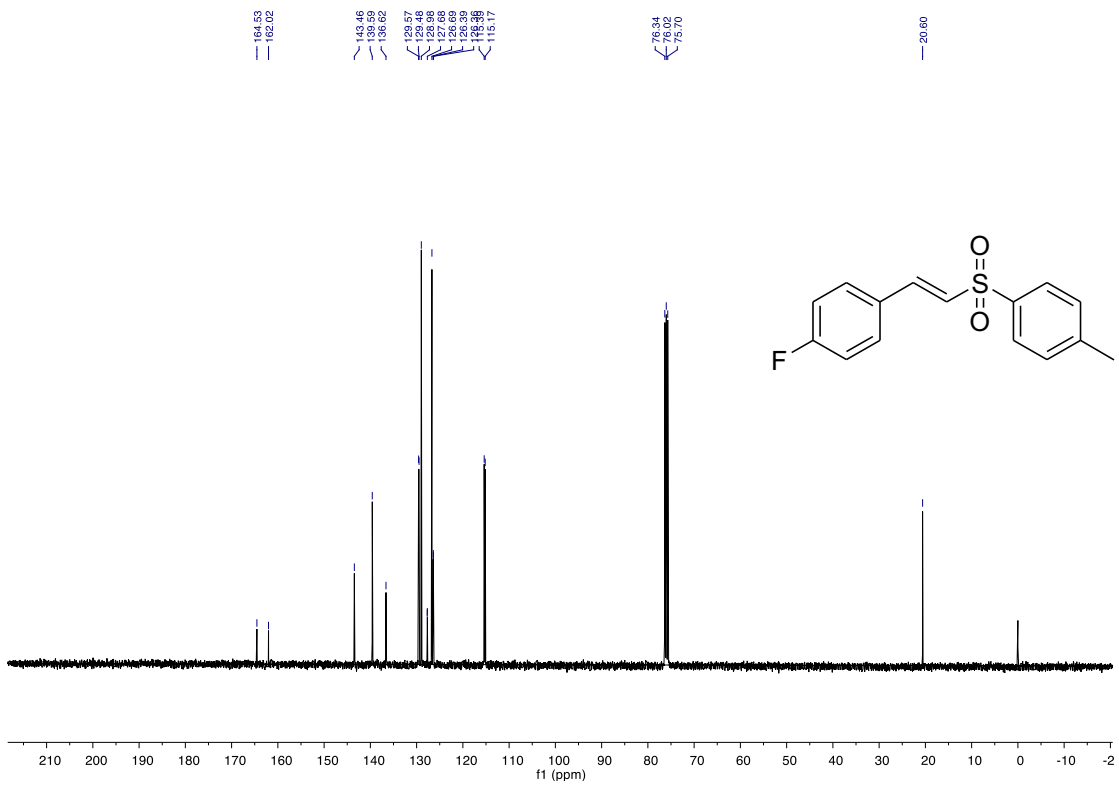

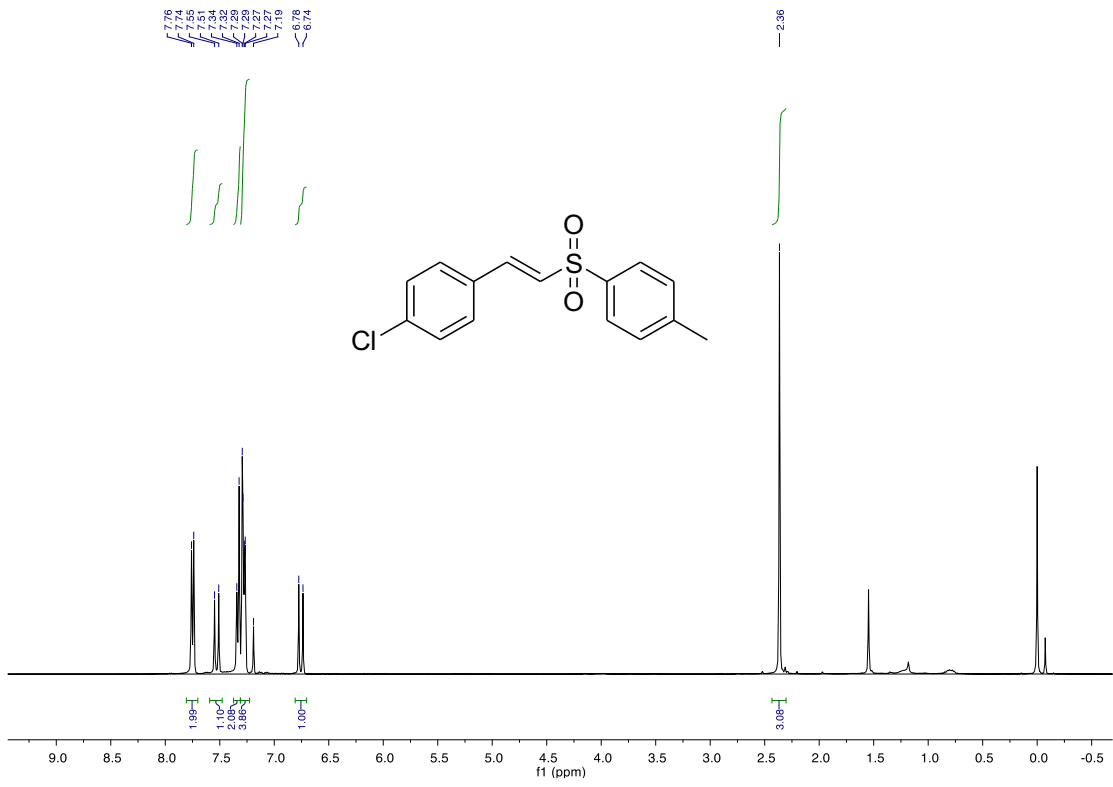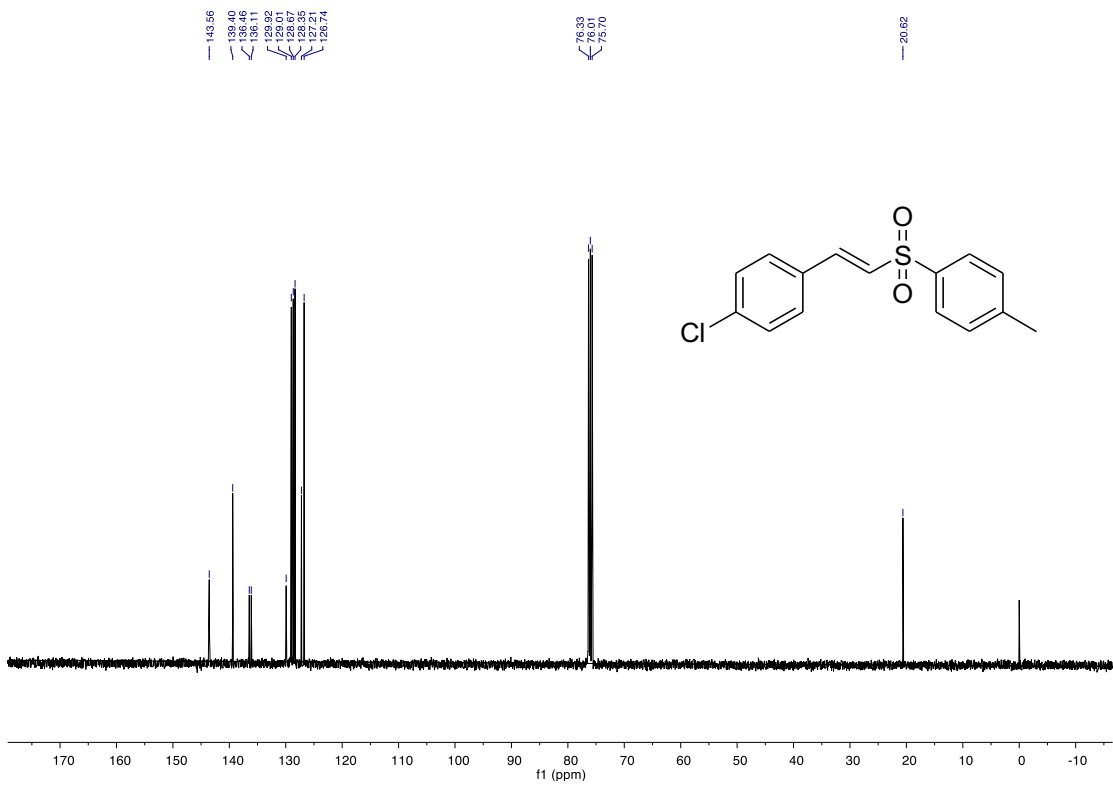

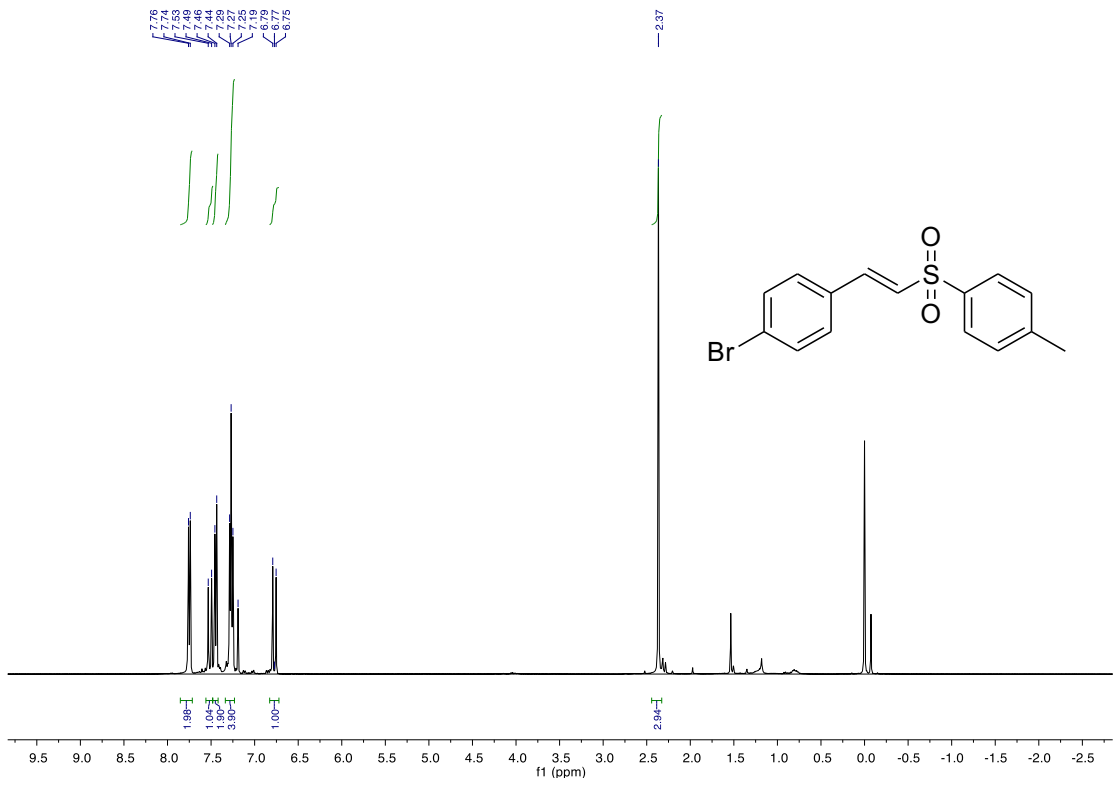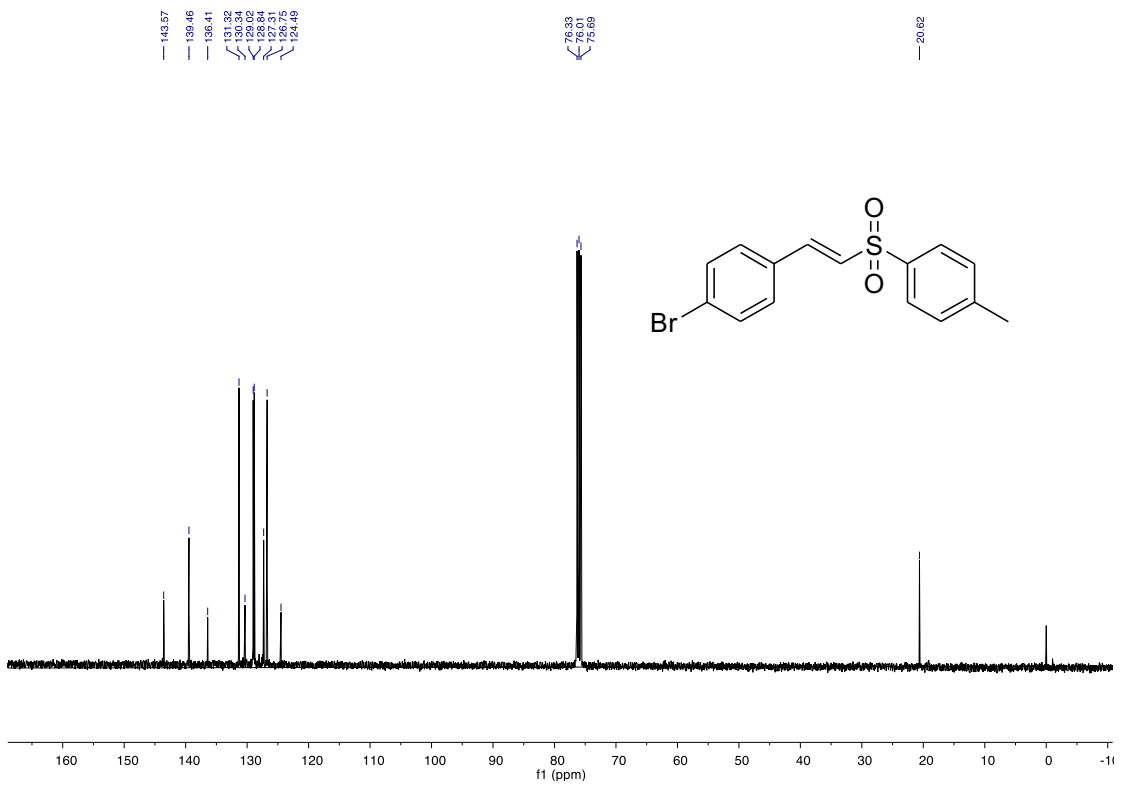

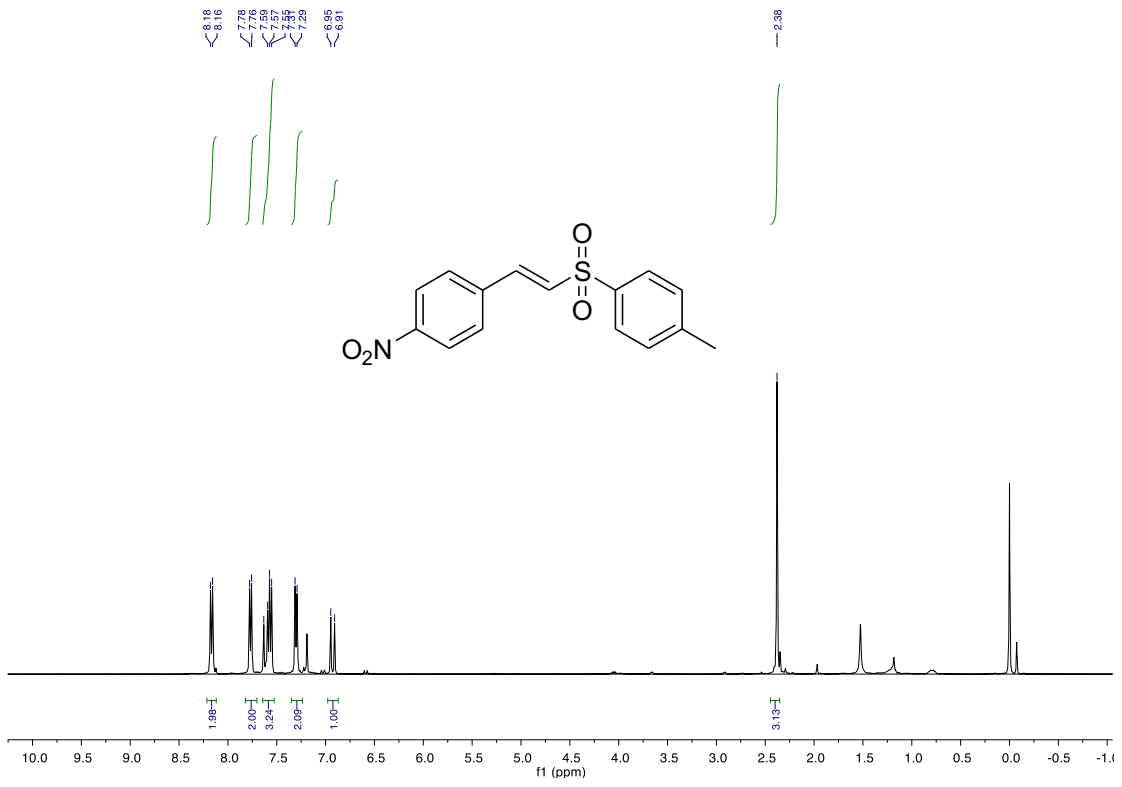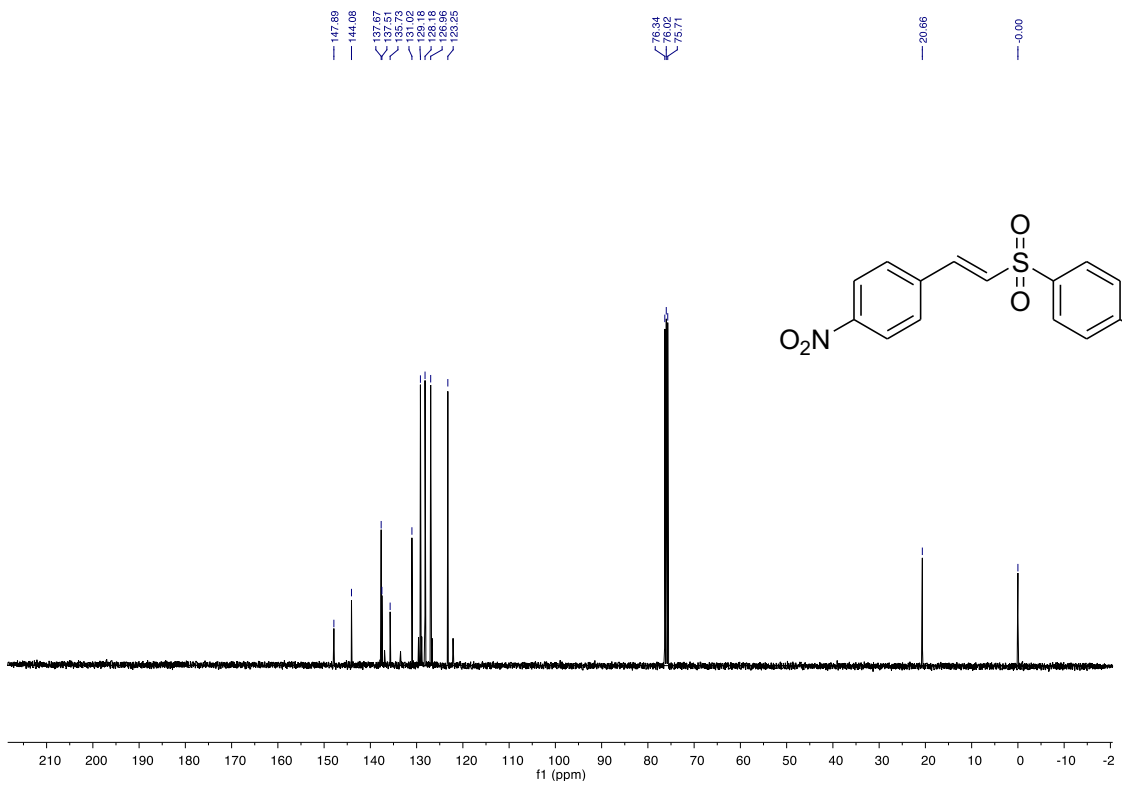

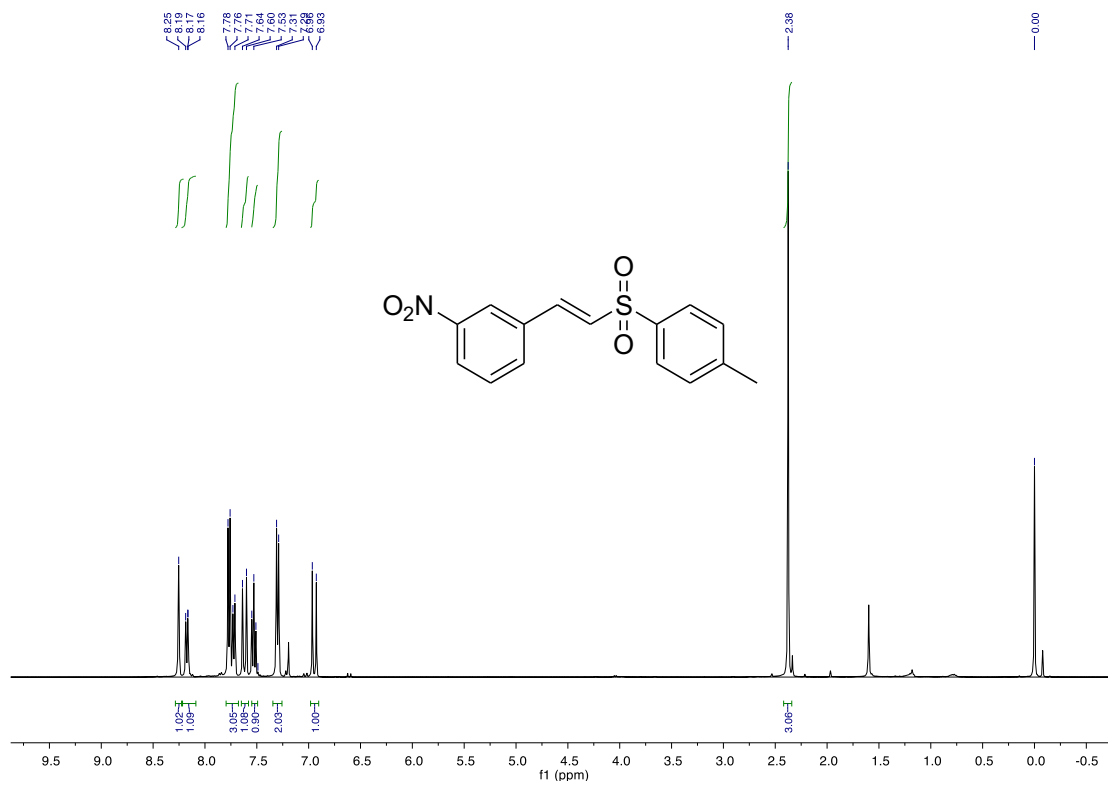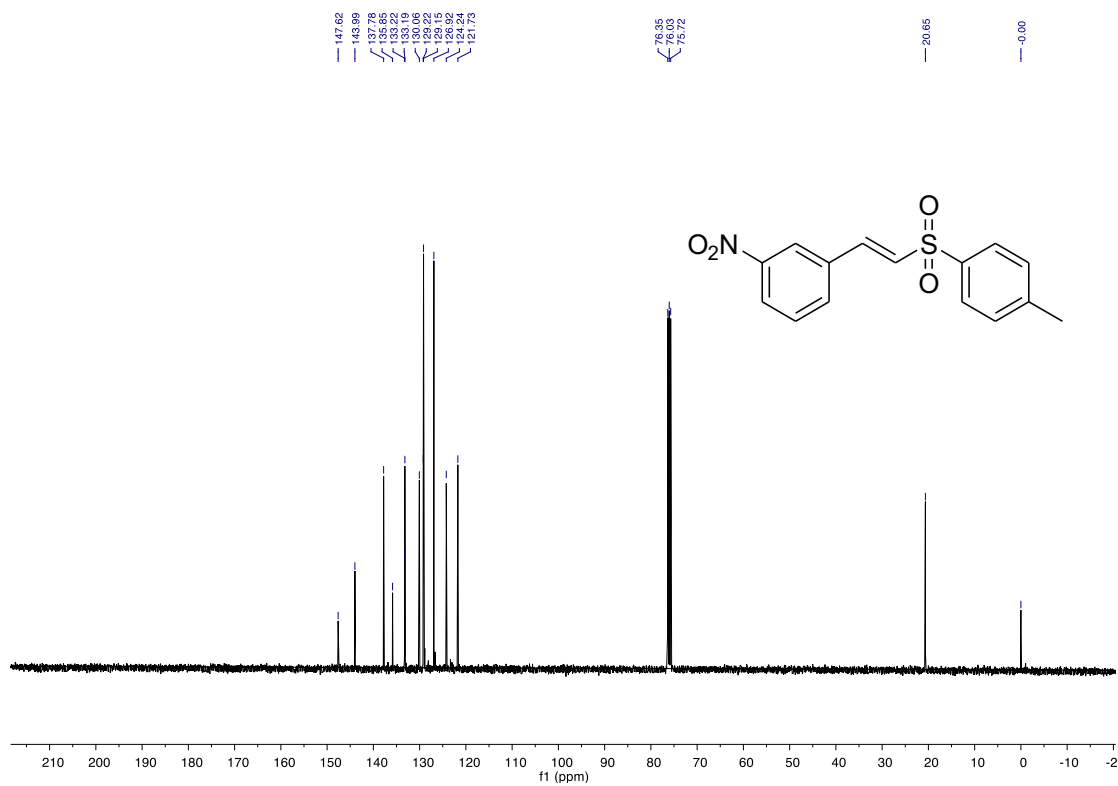

Supplement: c8ob01502c1.pdf [file c8ob01502c1.pdf]
